1 **Title: HBEGF<sup>+</sup> macrophages identified in rheumatoid arthritis promote joint**  
2 **tissue invasiveness and are reshaped differentially by medications**

3 **Authors:** David Kuo<sup>1,2,‡</sup>, Jennifer Ding<sup>3,†,‡</sup>, Ian Cohn<sup>3</sup>, Fan Zhang<sup>4,5,6,7</sup>, Kevin Wei<sup>8</sup>, Deepak  
4 Rao<sup>8</sup>, Cristina Rozo<sup>3</sup>, Upneet K. Sokhi<sup>3</sup>, Accelerating Medicines Partnership RA/SLE Network,  
5 Edward F. DiCarlo<sup>9</sup>, Michael B. Brenner<sup>8</sup>, Vivian P. Bykerk<sup>3,10</sup>, Susan M. Goodman<sup>3,10</sup>, Soumya  
6 Raychaudhuri<sup>4,5,6,11</sup>, Gunnar Rätsch<sup>12,2</sup>, Lionel B. Ivashkiv<sup>3,10,13,§</sup>, Laura T. Donlin<sup>3,10,§,\*</sup>

7  
8 **Affiliations:**

9 <sup>1</sup>Graduate Program in Physiology, Biophysics and Systems Biology, Weill Cornell Graduate  
10 School of Medical Sciences, New York, NY, 10065, USA.

11 <sup>2</sup>Computational Biology Program, Sloan Kettering Institute, 1275 York Avenue, New York, NY,  
12 10065, USA.

13 <sup>3</sup>Arthritis and Tissue Degeneration Program and the David Z. Rosensweig Genomics  
14 Research Center, Hospital for Special Surgery, New York, NY 10021, USA.

15 <sup>4</sup>Center for Data Sciences, Brigham and Women's Hospital, Boston, MA 02115, USA.

16 <sup>5</sup>Division of Rheumatology and Genetics, Department of Medicine, Brigham and Women's  
17 Hospital, Boston, MA 02115, USA.

18 <sup>6</sup>Department of Biomedical Informatics, Harvard Medical School, Boston, MA 02115 USA.

19 <sup>7</sup>Medical and Population Genetics, Broad Institute, Cambridge MA 02142 USA.

20 <sup>8</sup>Division of Rheumatology, Immunology, Allergy, Brigham and Women's Hospital and Harvard  
21 Medical School, Boston, Massachusetts 02115, USA.

22 <sup>9</sup>Department of Pathology and Laboratory Medicine, Hospital for Special Surgery, New York,  
23 NY USA.

1 <sup>10</sup>Weill Cornell Medical College, New York, NY 10021, USA.

2 <sup>11</sup>Arthritis Research UK Centre for Genetics and Genomics, Centre for Musculoskeletal  
3 Research, Manchester Academic Health Science Centre, The University of Manchester, Oxford  
4 Road, Manchester, UK.

5 <sup>12</sup>Department of Computer Science, Universitätstrasse 6, ETH Zürich, 8092 Zürich, Switzerland

6 <sup>13</sup>Weill Cornell Graduate School of Medical Sciences, New York, NY 10021.

7 †Present Address: Department of Neurobiology, The University of Chicago, Chicago, Illinois  
8 60637, USA.

9 ‡Co-first authors

10 §Co-senior authors

11 \*Correspondence to: Laura T. Donlin ([donlinl@hss.edu](mailto:donlinl@hss.edu))

12

13 **One Sentence Summary:**

14 A newly identified human macrophage phenotype from patients with the autoimmune condition  
15 RA is found to promote joint tissue invasiveness and demonstrates variable sensitivities to anti-  
16 inflammatory medications used to treat the disease.

17

18

19

20

21

22

1 **Abstract:**

2 Macrophages tailor their function to the signals found in tissue microenvironments, taking on a  
3 wide spectrum of phenotypes. In human tissues, a detailed understanding of macrophage  
4 phenotypes is limited. Using single-cell RNA-sequencing, we define distinct macrophage subsets  
5 in the joints of patients with the autoimmune disease rheumatoid arthritis (RA), which affects  
6 ~1% of the population. The subset we refer to as HBEGF<sup>+</sup> inflammatory macrophages is  
7 enriched in RA tissues and shaped by resident fibroblasts and the cytokine TNF. These  
8 macrophages promote fibroblast invasiveness in an EGF receptor dependent manner, indicating  
9 that inflammatory intercellular crosstalk reshapes both cell types and contributes to fibroblast-  
10 mediated joint destruction. In an *ex vivo* tissue assay, the HBEGF<sup>+</sup> inflammatory macrophage is  
11 targeted by several anti-inflammatory RA medications, however, COX inhibition redirects it  
12 towards a different inflammatory phenotype that is also expected to perpetuate pathology. These  
13 data highlight advances in understanding the pathophysiology and drug mechanisms in chronic  
14 inflammatory disorders can be achieved by focusing on macrophage phenotypes in the context of  
15 complex interactions in human tissues.

16

17

18

19

20

21

22

23

## 1 **Introduction**

2 Macrophage plasticity provides tailored homeostatic, immunologic and reparative mechanisms in  
3 a wide-range of tissues (1, 2). Their transcriptional, epigenetic and functional versatility allow  
4 macrophages to conform to tissue- and disease-specific factors, resulting in phenotypes  
5 indicative of the type of tissue and physiologic state (3-9). While macrophages are a unifying  
6 feature in chronic human diseases such as atherosclerosis, autoimmunity and granulomas (2, 10,  
7 11), little is known about macrophage phenotypes in the context of human tissue pathology—  
8 particularly at the single-cell level. Furthermore, while *in vitro* studies have provided valuable  
9 insights into the range of macrophage polarization states (12, 13), the relevance of these well-  
10 characterized responses has been difficult to document in human tissues.

11 A precise understanding of human tissue macrophages may enable more effective  
12 therapeutic decisions for inflammatory diseases, where it has often been difficult to discern  
13 which molecular pathways to target. For example, in inflammatory bowel diseases cytokines  
14 such as IL-17 and IFN- $\gamma$  have been implicated in the pathophysiology, yet blockade of these  
15 factors have produced variable results and in some cases worsens symptoms, whereas anti-TNF  
16 therapies are commonly effective (14). In the autoimmune disease rheumatoid arthritis (RA)  
17 nonsteroidal anti-inflammatory drugs (NSAIDS) treat pain and components of inflammation, but  
18 for unclear reasons do not curb joint erosion (15), whereas anti-TNF therapies have proven  
19 highly effective on both fronts. Macrophages, as innate immune cell types common to tissues  
20 that are heavily influenced by microenvironmental factors, could serve in affected tissues as  
21 indicators of disease pathways and as targets of tailored treatments. Furthermore, in cancer, new  
22 therapeutic strategies not only disrupt support of tumor growth and metastasis by macrophages,  
23 but aim to repolarize them towards pro-resolution anti-tumor states (16, 17). To develop such

1 therapeutics for autoimmune and inflammatory conditions, an in-depth classification is needed  
2 for tissue macrophages and how medications redirect them, amidst the complexity of tissue and  
3 disease signals, towards beneficial or a differing yet pathologic state.

4 In the chronically inflamed RA joint tissue, macrophages are understood to be a source of  
5 TNF, a well-established driver of RA (18-21). However, the precise nature and variety of  
6 macrophages within the RA synovium is not yet defined, nor is the cumulative impact of  
7 surrounding intercellular interactions and medication-induced perturbations on macrophage  
8 responses in RA tissue pathology.

9

## 10 **RESULTS**

### 11 **Single-cell RNA sequencing detects HBEGF<sup>+</sup> inflammatory macrophages in RA synovial** 12 **tissue**

13 To define the spectrum of macrophage phenotypes in a human tissue affected by autoimmunity,  
14 as reported (22), we sorted synovial cells from ten RA patients and two osteoarthritis (OA)  
15 disease control patients by CD14<sup>+</sup> cell surface protein expression and applied single-cell RNA  
16 sequencing (scRNA-seq, CEL-Seq2). After stringent quality control filtering, 940 CD14<sup>+</sup> single  
17 cells clustered into four major CD14<sup>+</sup> synovial cell subsets based on Canonical Correlation  
18 Analysis (CCA) as described (22)(Fig. 1A). Cells from all four clusters expressed genes that  
19 define the myeloid lineage, such as *CD68*, *CD163* and *CIQA* and based on their high levels of  
20 *CD14* (Fig. S1A), we designated these cells macrophages rather than dendritic cells (7, 23).  
21 Clusters 1 and 2 contained the majority of the CD14<sup>+</sup> synovial cells (45% and 30%, respectively)  
22 and the largest number of genes that distinguished them from the other clusters, such as *PLAUR*  
23 and *HBEGF* for Cluster 1 (referred to as the ‘Cluster 1 HBEGF<sup>+</sup>’) and *ADORA3* and *MERTK* for

1 Cluster 2 (Fig. 1B, Fig. S1B, 125 and 193 genes >2-fold, respectively). Cluster 3 appeared less  
2 well defined by positive markers, whereas Cluster 4 had robust markers including IFN-target  
3 genes such as *IFI6* and *IFI44L* and herein is referred to as the ‘IFN/STAT’ cluster (Fig. 1B, Fig.  
4 S1B).

5 To estimate the abundance of the macrophage clusters in RA tissue, we sorted CD14<sup>+</sup>  
6 synovial cell populations from 18 RA and 14 OA patients and analyzed them using bulk RNA-  
7 seq (~1,000 CD14<sup>+</sup> cells from each patient) as reported (22). We detected 1,726 genes with  
8 distinct expression patterns between the disease states (FDR adjusted p value <0.1). Enriched in  
9 RA CD14<sup>+</sup> cell populations, we detected elevated levels of genes and pathways that associate  
10 with RA disease such as *TNF*, *STAT1* and *STAT4* and the response to TNF, Interferon and  
11 Inflammation (Gene Set Enrichment Analysis (GSEA)) (Fig. 1C, left and right panel,  
12 respectively) (24-27). Overlaying the RA versus OA comparison with markers from each of the  
13 single-cell clusters, we found that genes defining Cluster 1 HBEGF<sup>+</sup> and Cluster 4 IFN/STAT  
14 were consistently more abundant in RA CD14<sup>+</sup> populations, suggesting an enrichment of these  
15 cell subsets in RA (Fig. 1D). Cluster 2 genes were in higher ratios in OA tissues, while Cluster 3  
16 markers showed no consistent association with either disease (Fig. 1D). Furthermore, RA CD14<sup>+</sup>  
17 populations were positively enriched in genes sets from Cluster 1 HBEGF<sup>+</sup> and Cluster 4  
18 IFN/STAT while negatively enriched in Cluster 2 genes (GSEA, FDR adjusted p-value  
19 <0.001)(Fig. 1E, light grey bars).

20 To identify factors from the microenvironment that shape synovial macrophage  
21 phenotypes, the synovial CD14<sup>+</sup> single-cell gene sets were compared to human blood-derived  
22 macrophages activated by diverse stimuli (Fig. 1E, colored bars, ranked gene lists). Cluster 1  
23 HBEGF<sup>+</sup> and Cluster 4 IFN/STAT genes were positively enriched in pro-inflammatory M1-like

**Fig. 1**

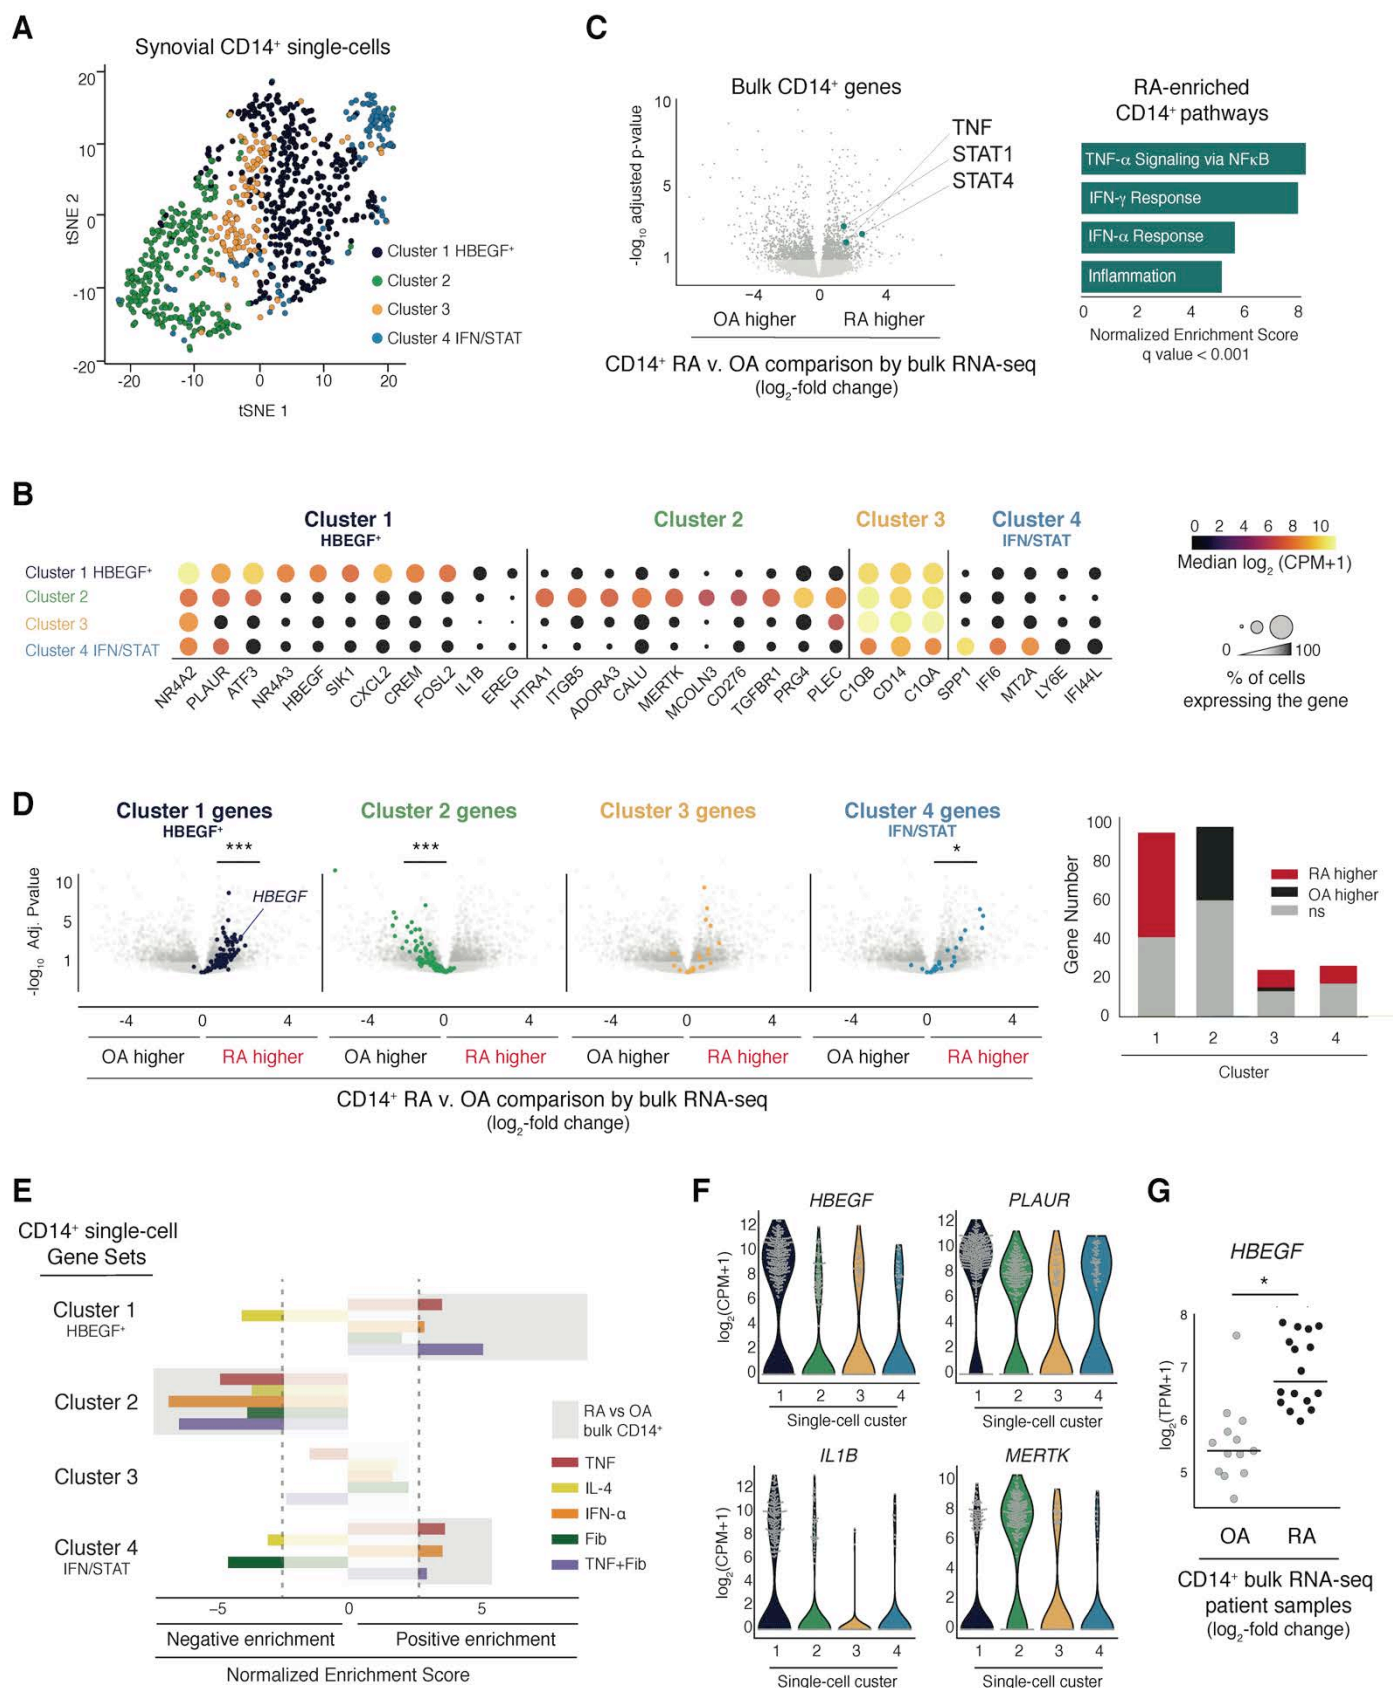

1  
2 **Fig. 1. HBEGF<sup>+</sup> inflammatory macrophage identification in RA joints by single-cell RNA-**  
3 **sequencing.** (A) Synovial CD14<sup>+</sup> single-cell RNA-seq clusters (940 cells) identified by  
4 Canonical Correlation Analysis (22). (B) CD14<sup>+</sup> single-cell cluster marker genes. Median  
5 expression indicated by color and percentage of expressing cells indicated by size. (C)  
6 Differential gene expression for bulk CD14<sup>+</sup> synovial cells from RA (n=16) versus OA (n=13)  
7 patients plotted as  $\log_2$  fold-change with  $-\log_{10}$  FDR adjusted p-value; dark grey <0.1. Right:  
8 Positively enriched pathways in RA bulk CD14<sup>+</sup> cells. (D) CD14<sup>+</sup> single-cell cluster genes (up to  
9 100) highlighted on the bulk RA v. OA plot from b (Bonferroni corrected p-value < 0.1,  
10 expressed in  $\geq 30\%$  of cells). Hypergeometric test: \*\*\*,\* represent  $p < 10^{-6}$ ,  $< 10^{-3}$ , respectively.  
11 Right: Number of cluster genes higher in RA or OA bulk comparison or not significant (ns)  
12 (FDR adjusted p-value < 0.1). (E) GSEA using the CD14<sup>+</sup> single-cell markers as Gene Sets and  
13 ranked gene lists from human blood-derived macrophages exposed to various stimuli (colored  
14 bars) or the bulk CD14<sup>+</sup> RA v. OA analysis (background grey bars). Normalized enrichment  
15 score;  $|\text{NES}| > 2.5$  were significant at FDR adjusted  $p < 0.001$ . (F) Gene expression level for each  
16 cell, plotted as  $\log_2$  counts per million (CPM)+1. (G) HBEGF expression in patient CD14<sup>+</sup> bulk  
17 populations, plotted as  $\log_2$  transcripts per million (TPM)+1. n=16 RA, 13 OA samples. \*,  
18 Bonferroni corrected p value  $< 10^{-3}$ .

19  
20  
21  
22  
23



1 macrophage genes induced by TNF and anti-correlated with the IL-4 driven M2 anti-  
2 inflammatory phenotype, indicating these two macrophage subsets are activated by pro-  
3 inflammatory factors (Fig. 1E, red v yellow bars). Conversely, Cluster 2 genes were negatively  
4 enriched for TNF-induced inflammatory response suggesting an anti-inflammatory phenotype,  
5 while the lack of enrichment with the IL-4 induced M2 state potentially indicates a novel tissue  
6 macrophage phenotype. The limited number of Cluster 3 positive markers did not significantly  
7 associate with any of the stimulated macrophage states.

8 As the most abundant cell type in the RA synovium (28) (Fig. S2A), synovial fibroblasts  
9 can evoke large shifts in macrophage gene expression profiles (29). Importantly, the combination  
10 of synovial fibroblasts together with TNF (TNF+Fib) generated a macrophage phenotype that  
11 aligned with Cluster 1 HBEGF<sup>+</sup> macrophages more than the other stimuli (Fig. 1E). This was  
12 unlikely due to an additive effect that exacerbates the TNF response, as synovial fibroblasts and  
13 TNF can independently induce robustly opposing effects, for example in Cluster 4 genes (Fig.  
14 1E). Thus, we posited that the abundant Cluster 1 HBEGF<sup>+</sup> macrophages identified by single-cell  
15 analyses from affected human tissue are driven by the combination of tissue-specific factors  
16 from the resident synovial fibroblasts and inflammatory signals such as TNF found in the RA  
17 synovium.

18 Consistent with enrichment in RA, the CD14<sup>+</sup> Cluster 1 HBEGF<sup>+</sup> single-cells expressed  
19 high levels of classic inflammatory genes like *IL1B* and low levels of M2-associating genes such  
20 as *MERTK* (Fig. 1B, F)(13). However, Cluster 1 HBEGF<sup>+</sup> cells were also distinctively high in  
21 the expression of genes such as *HBEGF* (Heparin Binding EGF Like Growth Factor) and  
22 *PLAUR* (plasminogen activator, urokinase receptor) (Fig. 1F), which have largely been reported  
23 as marking anti-inflammatory phenotypes or cells derived from a combination of pro- and anti-

1 inflammatory triggers (30, 31). Considering this distinct program (Fig. 1G), we designate Cluster  
2 1 macrophages ‘HBEGF<sup>+</sup> inflammatory macrophages’.

3       Importantly, in an independent study using a droplet-based single-cell RNA-seq platform  
4 (Drop-seq) applied to five RA patient synovial tissues (Fig. S2A)(28), we have detected an  
5 abundant macrophage subset with considerable overlap of marker genes with the HBEGF<sup>+</sup>  
6 inflammatory macrophages (Fig. S2B, 62%), including *HBEGF*, *PLAUR*, *IL1B* and *CREM* (Fig.  
7 S2C). Overlap with the other CD14<sup>+</sup> single-cell clusters was less clear, potentially due to  
8 differences in the patient populations in the two studies. Nonetheless, through independent  
9 single-cell platforms and patient cohorts, synovial macrophages of the HBEGF<sup>+</sup> inflammatory  
10 macrophage phenotype can be robustly detected in human tissue affected by RA.

11

## 12 **Tissue-resident synovial fibroblasts shape HBEGF<sup>+</sup> inflammatory macrophages**

13 To further define the HBEGF<sup>+</sup> inflammatory phenotype, we compared the transcriptome of  
14 macrophages exposed to TNF and synovial fibroblasts versus TNF alone. In a transwell co-  
15 culture system where both cell types were exposed to TNF (24h, n=4 donors), synovial  
16 fibroblasts altered the expression of 3,709 macrophage genes (FDR adjusted p value < 0.1)(Fig.  
17 2A). The majority of fibroblast-mediated effects opposed the direction of change brought on by  
18 TNF alone (Fig. 2A, 69% of fibroblast-effects anti-correlated with TNF effects, upper left +  
19 lower right). These changes included downregulation of TNF-inducible pro-inflammatory  
20 mediators such as *CFB*, *CXCL13*, *CCL8*, *MT1H*, *MMP2* and *SLAMF7* (Fig. 2A, upper left, genes  
21 not labeled). Alternatively, fibroblasts upregulated M2-like anti-inflammatory factors, otherwise  
22 suppressed by TNF, including *MRC1*, *MSR1*, and *TREMI* (Fig. 2A, lower right, genes not  
23 labeled). Pathway analysis indicated fibroblasts likely altered the metabolic state of TNF-treated

1 macrophages, indicated by a collective suppression of factors involved in Oxidative  
2 Phosphorylation (Fig. S3A).

3 Despite the largely opposing effects of synovial fibroblasts on the macrophage TNF  
4 response, fibroblasts enhanced or maintained induction of a substantial portion of TNF-induced  
5 HBEGF<sup>+</sup> inflammatory Cluster 1 genes, including *PLAUR* and *IL8* (Fig. 2A, upper right, red  
6 dots). Synovial fibroblasts also induced a portion of HBEGF<sup>+</sup> inflammatory genes that were  
7 suppressed by TNF treatment alone, such as *HBEGF*, *RGS2* and *CREM* (Fig. 2A, lower right, red  
8 dots, and 2B). This indicates within synovial tissue, fibroblasts can also modulate macrophage  
9 polarization by inducing a portion of Cluster 1 genes that would otherwise be downregulated  
10 upon TNF exposure. The induction of *HBEGF* by synovial fibroblasts peaked around 12 hour  
11 and lasted over the course of days (Fig. 2C; qPCR representative of n=6 donors). The expression  
12 of *PLAUR* and the RA-associated transcription factor *STAT4*, while elevated transiently by TNF  
13 alone, was hyperinduced by synovial fibroblasts, resulting in a second elongated wave over days  
14 (Fig. 2C). Enhanced gene expression correlated with an increase at the protein level for cell  
15 surface PLAUR and intracellular STAT4 (Fig. 2D, E, respectively).

16 Cross-referencing the fibroblast-induced HBEGF<sup>+</sup> macrophage profile with a panel of  
17 previously reported macrophage polarization states (12) demonstrated a strong correlation with  
18 macrophages treated with TNF and prostaglandin E2 (PGE<sub>2</sub>) and/or the Toll-like receptor 2  
19 (TLR2) ligand Pam3-Cys (referred to as ‘TPP’ (12, 32))(Fig. S3B, red text). This strong  
20 correlation differed from the weaker or negative correlations with canonical M1 and M2  
21 polarization states (induced by TNF or IFN- $\gamma$  and IL-4 or IL-13, respectively)(Fig. S3B). From  
22 these data, we hypothesized that PGE<sub>2</sub> mediated a considerable portion of the synovial fibroblast  
23 effect on macrophages. Indeed, TNF-stimulated synovial fibroblasts (Fig. 2F, F+T) produced

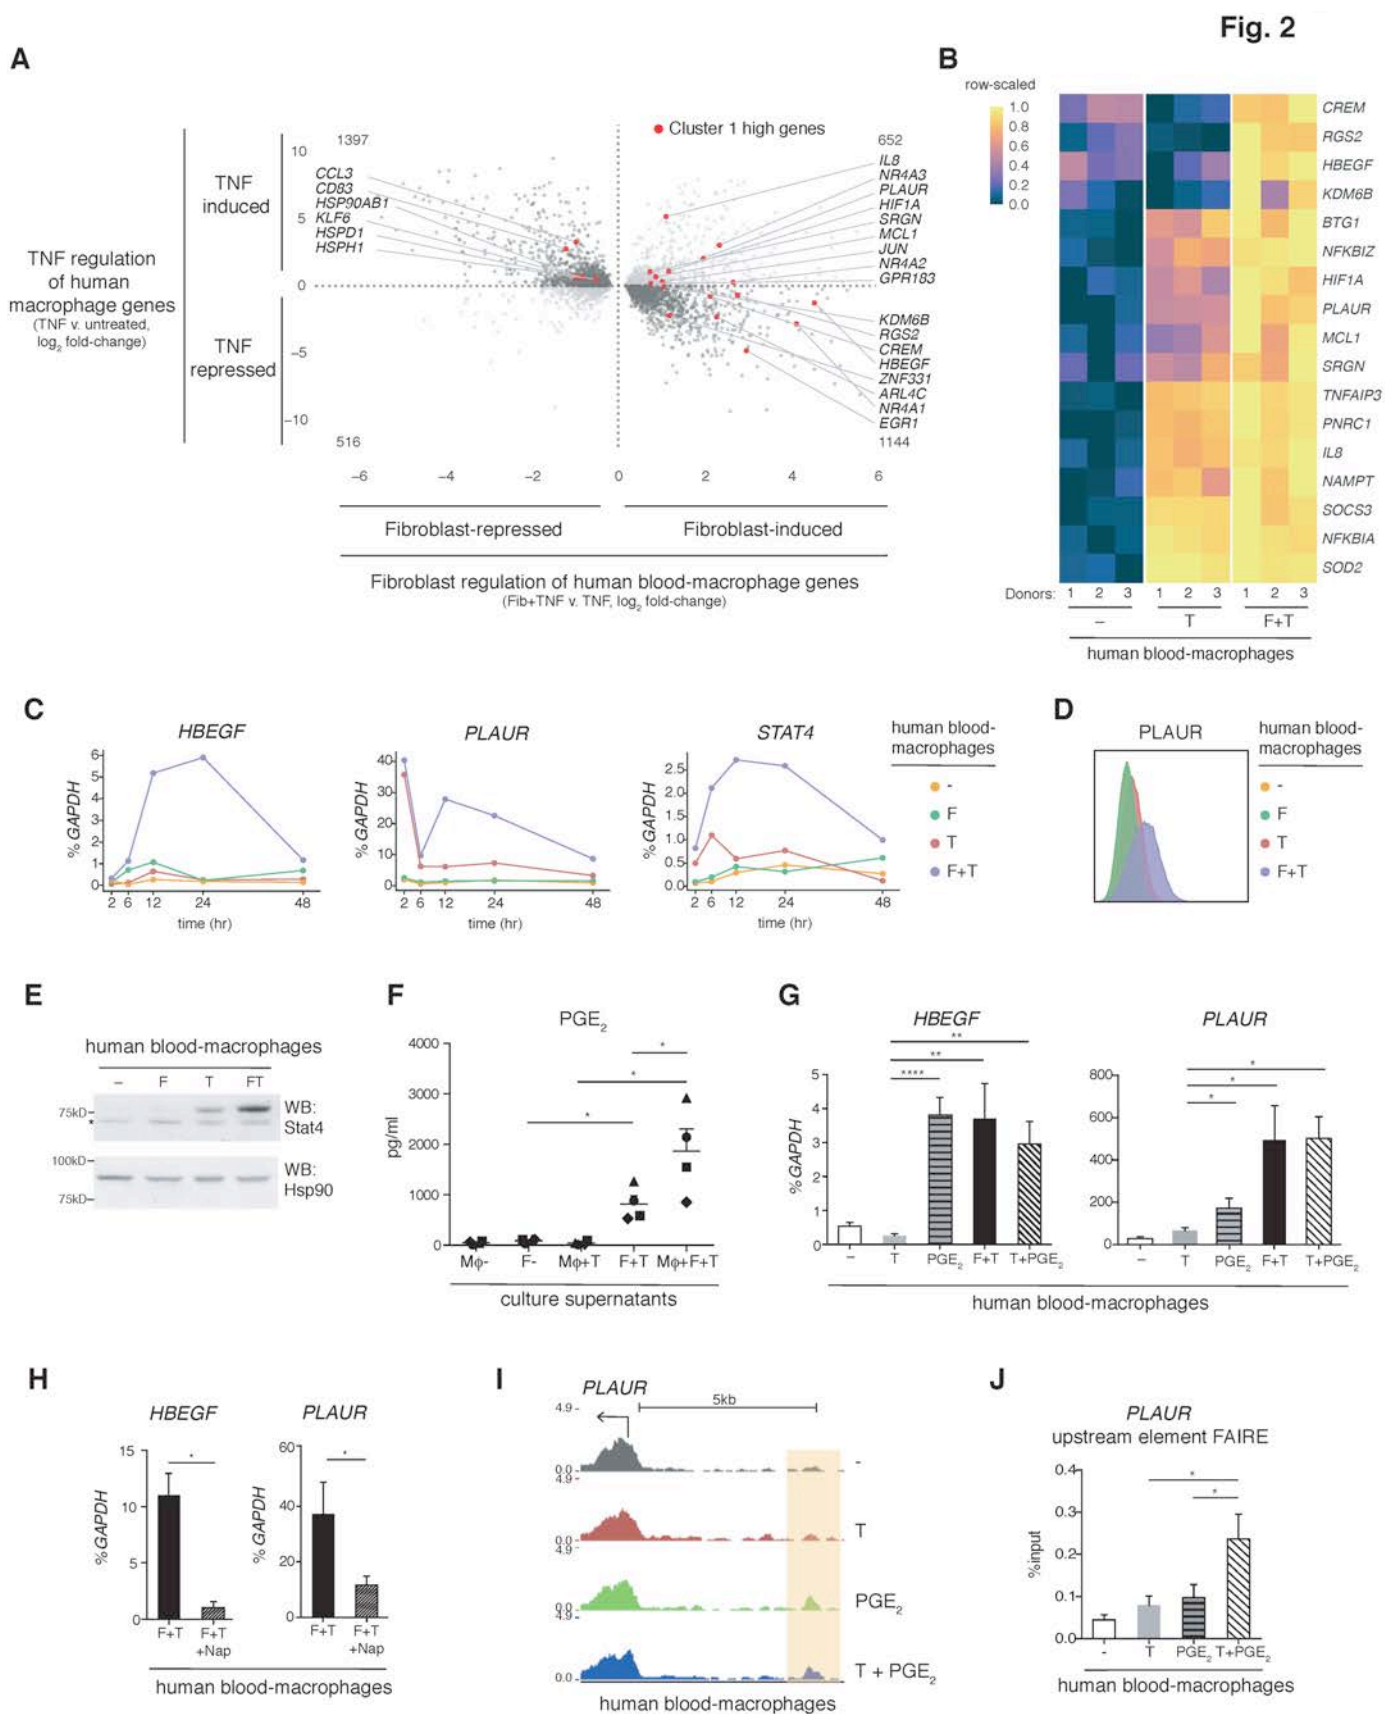

1  
2 **Fig. 2. HBEGF<sup>+</sup> inflammatory macrophages polarization by tissue fibroblasts.** (A) Human  
3 blood-derived macrophage genes regulated by synovial fibroblasts and TNF (3,709 genes, FDR  
4 adjusted  $p < 0.1$ ;  $n=4$  donors). Expression changes plotted as  $\log_2$ -fold. x-axis plots  
5 Fibroblasts+TNF v. TNF; y-axis plots TNF v. untreated. HBEGF<sup>+</sup> Cluster 1 single-cell markers  
6 labeled in red (expressed in  $>55\%$  of cells, Bonferroni corrected  $p < 10^{-6}$ ). (B) Expression of  
7 select synovial CD14<sup>+</sup> Cluster 1 genes in the blood-derived macrophages exposed to TNF (T) or  
8 fibroblasts + TNF (F+T).  $n=3$  donors. (C) qPCR of blood-derived macrophages overtime, plotted  
9 as percent (%) of GAPDH. Mean, standard error of the mean (SEM). Representative,  $n=4$   
10 donors. (D) *PLAUR* (CD87) surface protein detected by flow cytometry in blood-derived  
11 macrophages, 24h. Representative,  $n=3$  donors. (E) Western blot of STAT4 in blood-derived  
12 macrophages, 24h. Representative,  $n=4$  donors. \*, non-specific band. Hsp90, loading control. (F)  
13 Prostaglandin E2 (PGE<sub>2</sub>) ELISA on supernatants from blood-derived macrophages (M $\phi$ ), 24h.  
14  $n=4$  donors. Mean with SEM. (G) qPCR of blood-derived macrophages, 24h. prostaglandin E2,  
15 (PGE<sub>2</sub>).  $n=8$  donors. (H) qPCR of blood-derived macrophages, 24h. Nap, COX inhibitor  
16 naproxen (150nM). (I) ATAC-seq tracks from *PLAUR* gene promoter regions in blood-derived  
17 macrophages, 3h. Change in open chromatin, orange bar. (J) FAIRE-qPCR of open chromatin in  
18 region highlighted in subpanel I, % total input reported as mean SEM.  $n=4$  donors. \*, \*\*, \*\*\*\*  
19 represent  $p < 0.05$ , 0.01, 0.0001, respectively.

20

21

22

23

1 large amounts of PGE<sub>2</sub>, whereas macrophages produced no detectable PGE<sub>2</sub> irrespective of TNF  
2 exposure (Fig. 2F, MΦ and MΦ+T). Furthermore, induction of HBEGF<sup>+</sup> genes such as *PLAUR*  
3 and *HBEGF* in blood-derived macrophages was recapitulated by exogenous PGE<sub>2</sub> and TNF, with  
4 the fibroblast-mediated induction blocked by the COX enzyme inhibitor naproxen (Fig. 2G, H,  
5 respectively). The transcriptional induction of *PLAUR* expression associated with chromatin  
6 opening in the *PLAUR* promoter region, whereby TNF and prostaglandin synergized to open a  
7 new region, detected by ATAC-seq and verified by FAIRE-qPCR (Fig. 2I, J, respectively).

8         These data suggest that in the RA synovium, chronic exposure to the pro-inflammatory  
9 environment results in heightened synovial fibroblast production of prostaglandins that, together  
10 with inflammatory factors, drive macrophages towards a state distinct from classical M1 and M2  
11 polarization. Unique transcriptional regulators, cell surface markers, metabolic pathways and  
12 chromatin modifications mark this HBEGF<sup>+</sup> inflammatory state.

13

#### 14 **HBEGF<sup>+</sup> inflammatory macrophages promote fibroblast invasiveness**

15 To examine how HBEGF<sup>+</sup> inflammatory macrophages may impact RA pathology, we focused on  
16 their intercellular relationship with synovial fibroblasts. In an RNA-seq analysis, exposure to  
17 HBEGF<sup>+</sup> inflammatory macrophages altered 855 synovial fibroblast genes (FDR adjusted p-  
18 value <0.1), including induction of *IL11*, *LIF*, *CSF3* (GCSF), *IL33*, *IL6* and *PLAU* (Fig. 3A).  
19 Pathway analyses revealed an upregulated EGFR response in the fibroblasts, observed with two  
20 gene sets (one induced by EGFR ligands and a second blocked by an EGFR inhibitor)(Fig. 3B).  
21 Similar to the gene expression changes, we also detected increased GCSF and IL-33 protein  
22 secretion in the presence of HBEGF<sup>+</sup> macrophages (Fig. 3C). The increased molecular  
23 production of neutrophil chemoattractants and growth factors, such as GCSF, led us to

1 investigate potential cellular effects of HBEGF<sup>+</sup> inflammatory macrophages. We report  
2 neutrophil accumulation—a well-documented feature of RA joint fluid (33, 34) following co-  
3 culture of HBEGF<sup>+</sup> macrophages with synovial fibroblasts (Fig. S4A). Lastly, we found the  
4 expression of GCSF and IL-33 was sensitive to EGFR inhibition (AG-1478 (AG))(Fig. 3D),  
5 further implicating EGFR involvement in this inflammatory macrophage-fibroblast crosstalk  
6 system and identifying an additional therapeutic avenue to target HBEGF<sup>+</sup> macrophage driven  
7 inflammation.

8 To further understand the EGFR-mediated gene expression in the synovial fibroblasts, we  
9 investigated the levels of EGF ligands in this system. Synovial fibroblasts expressed only trace  
10 amounts of seven EGF ligands with no change in response to TNF and HBEGF<sup>+</sup> macrophages  
11 (Fig. S4B). In notable contrast, macrophages induced *HBEGF* and a second EGF ligand *EREG*  
12 (epiregulin) upon combined exposure of TNF and synovial fibroblasts (Fig. S4B). While *EREG*  
13 expression in the blood-derived macrophage system was higher than *HBEGF* (Fig. S4B), we  
14 have placed more emphasis on *HBEGF* as the RA patient synovial macrophages exhibit  
15 considerably higher expression of *HBEGF* (Fig. 1B). For EGF receptor expression, synovial  
16 fibroblasts expressed two subunits (EGFR and ERBB2), while neither blood-derived  
17 macrophages nor RA synovial macrophages expressed EGFR subunits (Fig. S4C, D).  
18 Considering these data, we posit synovial fibroblast EGFR responses correspond to production  
19 of EGF ligands by fibroblast-entrained inflammatory HBEGF<sup>+</sup> macrophages.

20 EGFR signaling is a robust regulator of fibroblast motility (35) and in RA, synovial  
21 fibroblasts invade and destroy cartilage and bone (36-39). Thus, we next tested whether the  
22 heightened EGF response influenced fibroblast migration through extracellular matrix. Indeed,  
23 pre-incubation of fibroblasts with TNF and macrophages induced a pronounced increase in



**Fig. 3**

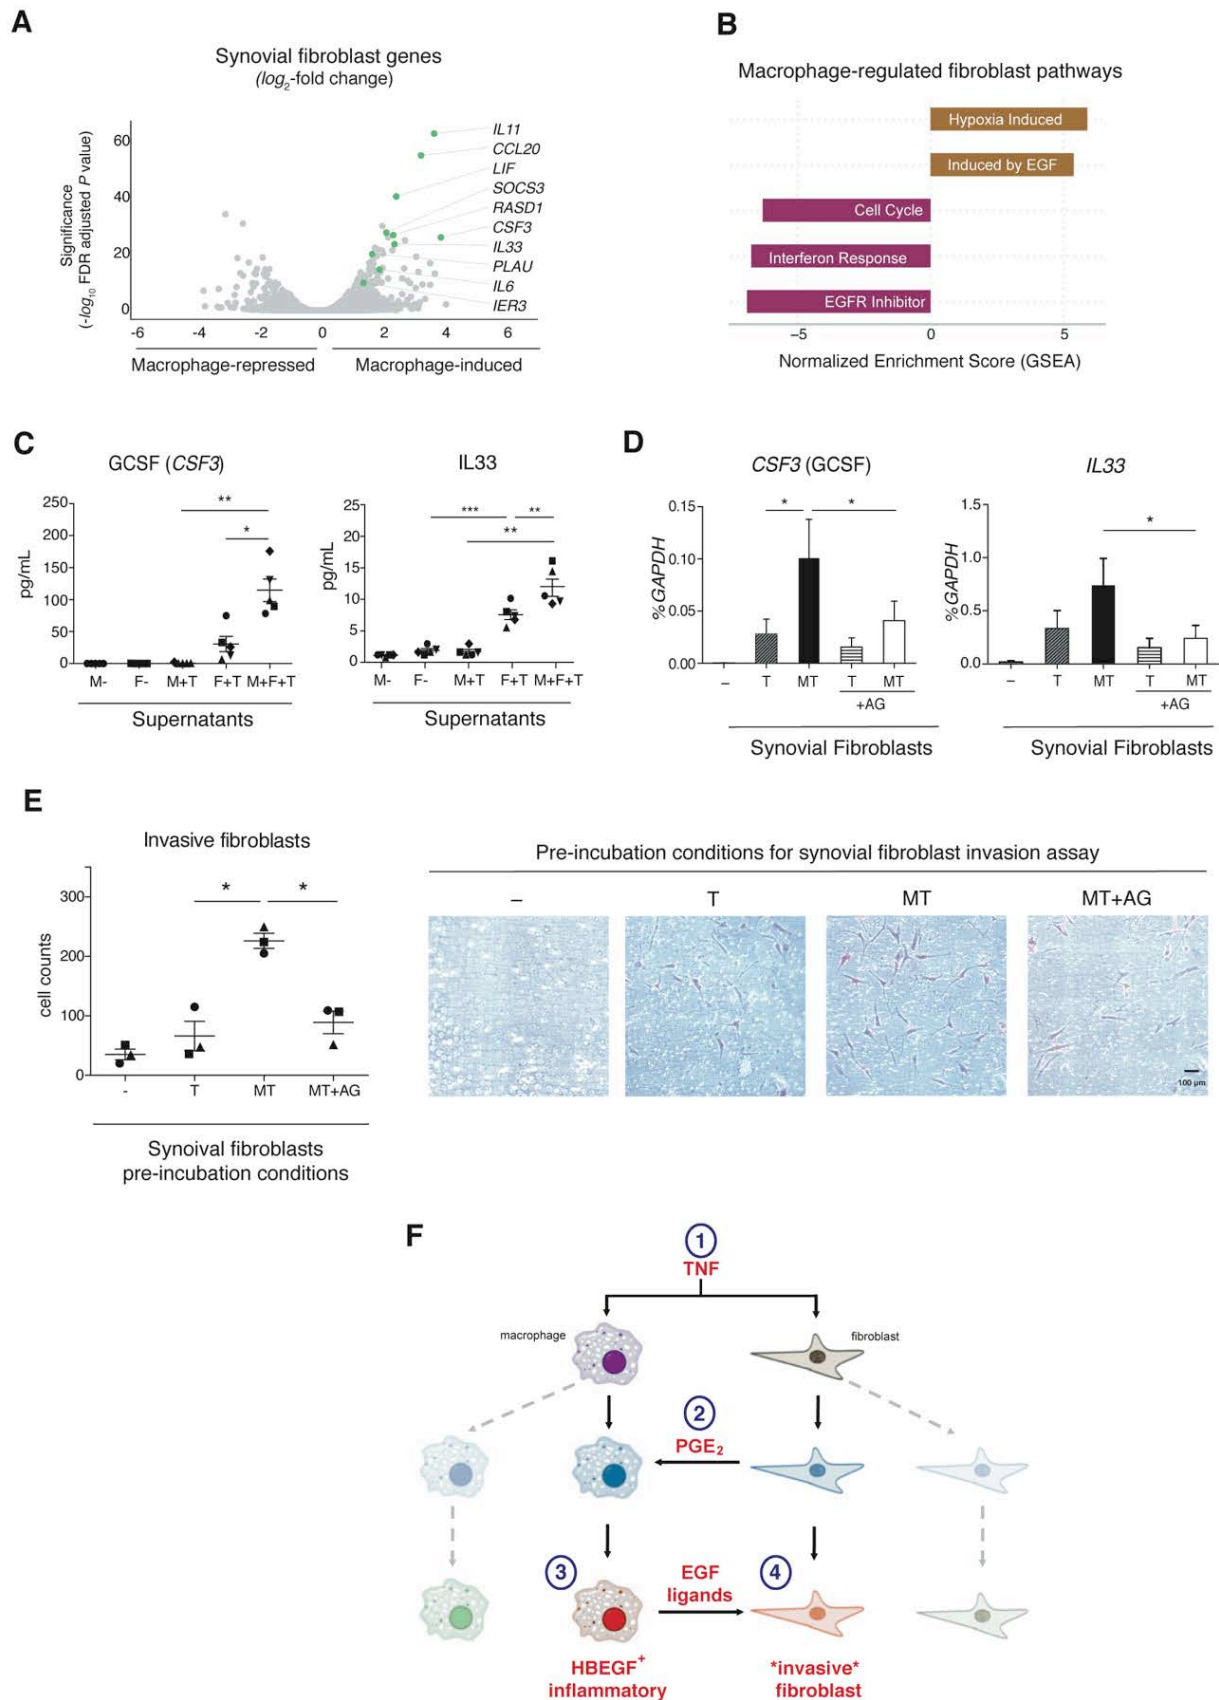



1  
2 **Fig. 3. HBEGF<sup>+</sup> inflammatory macrophages promote EGFR-dependent synovial fibroblast**  
3 **pathologic activity.** (A) Human synovial fibroblast genes altered by blood-derived macrophages  
4 during a TNF response (885 genes differentially expressed), RNA-seq. 48h. n=2 donors. x-axis:  
5  $\log_2$  fold-change by macrophages. y-axis: significance as the  $-\log_{10}$  FDR adjusted p-value. (B)  
6 Fibroblast pathways regulated by macrophages under TNF conditions (GSEA and Ingenuity  
7 Pathways Analysis (IPA). Macrophage-induced, brown. Macrophage-downregulated, maroon.  
8 (C) ELISA assay on supernatants of synovial fibroblast (F) cultures with or without  
9 macrophages (M) and TNF (T) for 48h. n=4 donors for both, reported as mean with SEM. (D)  
10 qPCR on fibroblasts, 32h. EGF receptor inhibitor, AG 1478 (AG). Mean, SEM. n=6 donors. (E)  
11 Synovial fibroblast Matrigel invasion assays, 18h after a 24h pre-incubation in with macrophages  
12 (M), TNF and the EGFR inhibitor (AG, 4  $\mu$ M). n=3 donors. \*, \*\*, \*\*\* represent p <0.05, 0.01,  
13 0.001 by paired Student's t-test, respectively. (F) Unique inflammatory response arises for  
14 nearby synovial macrophages and fibroblasts, wherein [1] TNF induces [2] prostaglandin  
15 production by fibroblasts that together with TNF in macrophages drives [3] HBEGF+  
16 inflammatory phenotype and EGF ligand production that then feeds back to induce [4] fibroblast  
17 invasive behaviors.

18

19

20

21

1 fibroblast invasiveness that was mitigated by EGF receptor inhibition (Fig. 3E, F). These data  
2 demonstrate that the HBEGF<sup>+</sup> macrophage-dependent EGFR response may promote pathologic  
3 fibroblast-mediated and pannus-associated tissue destructive behaviors in RA joints.

4

### 5 **RA medications target HBEGF<sup>+</sup> inflammatory macrophage polarization**

6 We next examined how clinically effective RA medications impact the polarization of HBEGF<sup>+</sup>  
7 inflammatory macrophages, using human blood-derived macrophages exposed to TNF and  
8 synovial fibroblasts. In comparison to macrophages exposed only to TNF, the presence of  
9 synovial fibroblasts substantially altered the impact of most medications (Fig. S5A). For  
10 example, the majority of auranofin targets were lost when macrophages were polarized towards  
11 the HBEGF<sup>+</sup> phenotype (1,300 genes, 67%) (Fig. S5A, blue versus yellow). In contrast, several  
12 medications gained more than 1,000 gene targets in HBEGF<sup>+</sup> inflammatory macrophages,  
13 including naproxen (Nap) and leflunomide (active metabolite A77) (Fig. S5A). Thus, the  
14 pronounced impact synovial fibroblasts confer onto macrophages includes alteration of drug  
15 responsiveness.

16 Several medications reversed a large portion of fibroblast-induced effects (~1,000 genes),  
17 suggesting the efficacy of these treatments could involve suppressed generation of HBEGF<sup>+</sup>  
18 inflammatory macrophage in RA synovium (Fig. 4A, black). This included leflunomide (A77),  
19 dexamethasone (steroid), naproxen and Triple therapy (Tri, hydroxychloroquine + sulfasalazine  
20 + methotrexate)(Fig. 4A, black). As naproxen inhibits COX enzyme-mediated prostaglandin  
21 production and affected the majority (~80%) of genome-wide fibroblast-mediated effects (Fig.  
22 4A and Fig. S5A-C), this further supports prostaglandins as a dominant fibroblast product  
23 driving HBEGF<sup>+</sup> inflammatory macrophages. The drug-induced inhibition of HBEGF<sup>+</sup>

1 inflammatory macrophages, however, resulted in at least two functionally distinct states.  
2 Naproxen, for example, blocked the prostaglandin arm driving HBEGF<sup>+</sup> inflammatory  
3 macrophages, but still permitted TNF polarization of the macrophages towards an M1-like pro-  
4 inflammatory phenotype, which presumably also functions pathologically in RA synovium (Fig.  
5 S5A-C). Medications like dexamethasone were capable of blocking large portions of both  
6 programs (Fig. S5A). This result highlights the importance of understanding the resulting  
7 phenotypes of macrophages targeted by medications, particularly in complex tissue settings  
8 where multiple factors could redirect macrophages towards a differing yet pathologic state.

9

#### 10 **RA medications target the HBEGF<sup>+</sup> inflammatory macrophage-synovial fibroblast axis in** 11 **patient samples**

12 To examine the impact of therapeutically targeting HBEGF<sup>+</sup> macrophages in RA joints, we  
13 directly assayed synovial tissue from RA patients with definitive RA diagnoses (40, 41) and  
14 extensive joint inflammation confirmed by histologic scoring (42, 43) (Table S1, n=8).  
15 Specifically, in an *ex vivo* tissue assay, synovium was dissociated into cell suspensions (44) and  
16 cultured with FDA-approved RA medications (Fig. 4B). Similar to the seminal assays that laid  
17 the precedent for anti-TNF therapies in RA (45), as well as the documented clinical responses  
18 (46, 47), exposure to anti-TNF antibodies ( $\alpha$ TNF, adalimumab) suppressed production of the  
19 inflammatory mediator IL-1 $\beta$  (Fig. 4C). Furthermore in this assay, the JAK inhibitor tofacitinib  
20 imparted striking reductions in genome-wide IFN $\alpha$  responses and protein levels for the  
21 JAK/STAT target *CXCL10* (IP10) (Fig. 4C).

22

23

Fig. 4

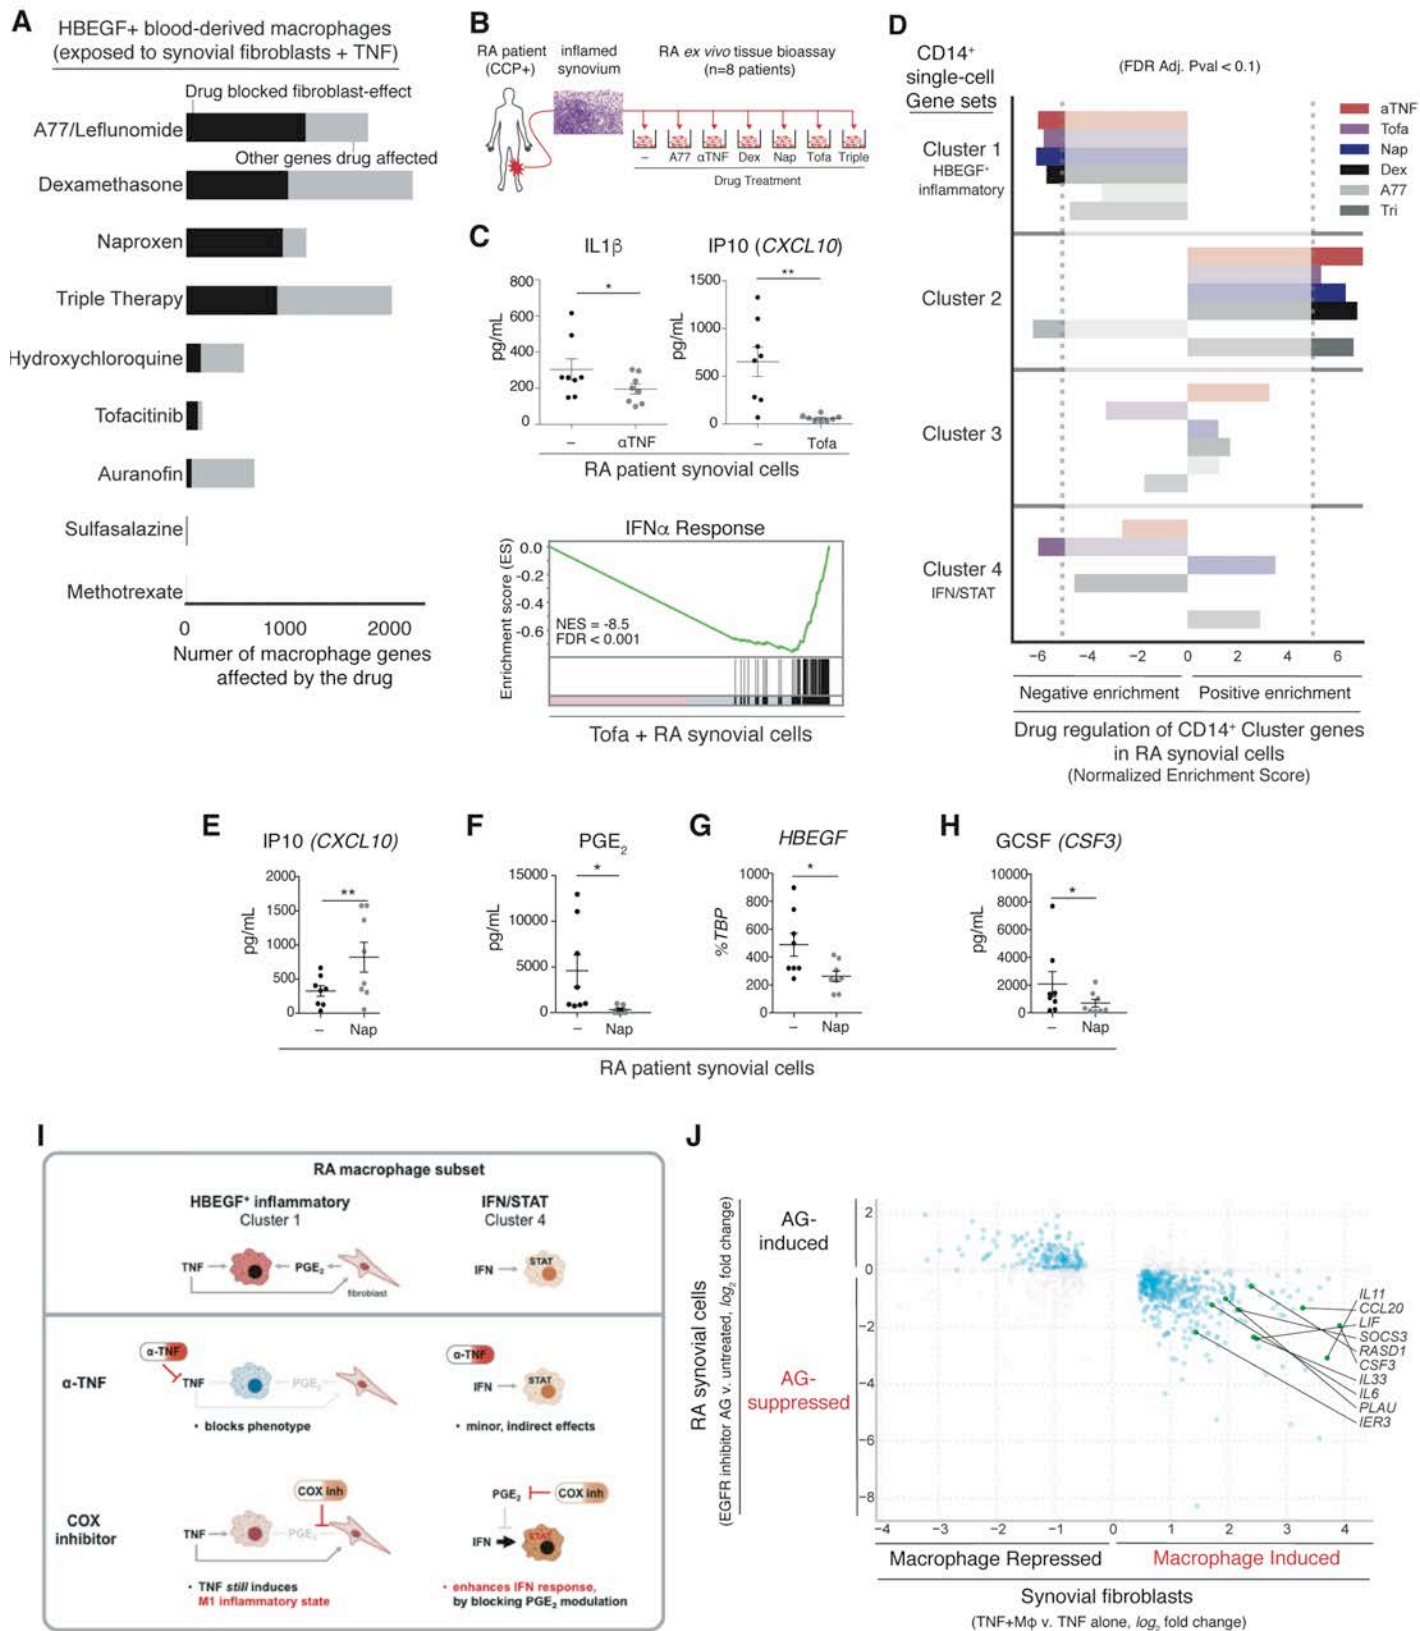

1  
2 **Fig. 4. Clinically effective RA medications and an FDA-approved EGFR inhibitor target**

3 **the HBEGF<sup>+</sup> inflammatory macrophage-fibroblast crosstalk signatures in RA tissue.**

4 (A) Number of blood-derived macrophage genes affected by RA medications in the presence of  
5 TNF and synovial fibroblasts, 24h. Black, genes opposed by drug. Grey, all other genes  
6 regulated by drug. FDR adjusted  $p < 0.1$ .  $n = 2$  to 4 donors. (B) RA patient synovial tissue *ex vivo*  
7 drug response assay using highly inflamed synovium. Dissociated cells were exposed in culture  
8 to a panel of medications, 24h. (C) ELISA on supernatants from RA tissue *ex vivo* assay.  $n = 8$   
9 donors. \*, \*\*:  $p < 0.05$ , 0.01, respectively by Wilcoxon signed-rank test. Lower panel: IFN $\alpha$   
10 response upon tofacitinib exposure, bulk RNA-seq and GSEA.  $n = 2$  donors. (D) Normalized  
11 enrichment scores (GSEA) for drug-induced gene expression in the RA patient *ex vivo* assay for  
12 CD14<sup>+</sup> single-cell Cluster markers. (E,H) ELISAs as described in c. (F) PGE<sub>2</sub> ELISA on  
13 supernatants. Mean, SEM.  $n = 7$  donors. \*,  $p < 0.05$ , paired Student's t-test. (G) qPCR on *ex vivo*  
14 synovial cells treated with naproxen, plotted as percent (%) of TBP.  $n = 7$  donors. Mean, SEM. \*,  
15  $p < 0.05$ , paired Student's t-test. (I) Schematic of differential effects of anti-TNFs and the COX  
16 inhibitor naproxen on the two RA-enriched synovial macrophage subsets. (J) RA patient *ex vivo*  
17 synovial expression changes with EGFR inhibitor AG-1478 (y-axis) compared to the synovial  
18 fibroblast gene regulation by macrophage and TNF (x-axis, data from Fig. 3A);  $n = 2$  donors.  
19 FDR adjusted  $p < 0.1$ , plotted as a  $\log_2$  fold-change. Highlighted genes from Fig. 3A.

20

21

22

1           Notably in this tissue explant assay, anti-inflammatory therapies such as anti-TNF,  
2   tofacitinib and dexamethasone inhibited the HBEGF<sup>+</sup> inflammatory synovial macrophage  
3   Cluster 1 gene set (Fig. 4D). Conversely, the panel of anti-inflammatory medications upregulated  
4   the Cluster 2 gene set (with one exception, A77/leflunomide) (Fig. 4D), further suggesting  
5   Cluster 2 cells possesses anti-inflammatory features, which also aligns with high levels of anti-  
6   inflammatory genes *MERTK*, *TGFBI* and *MARCO* (48-50)(Fig. 1F, Fig. S5D). Tofacitinib was  
7   the most potent inhibitor of the Cluster 4 ‘IFN/STAT’ gene set, further implicating a robust  
8   JAK/STAT response in this RA-associated macrophage subset (Fig. 4C). Interestingly, the  
9   JAK/STAT response in Cluster 4 was induced by naproxen, as shown by enrichment in Cluster 4  
10   genes and an elevated *CXCL10*/IP10 protein production in naproxen-treated RA synovial cells  
11   (Fig. 4D-F). This correlated with reduced prostaglandins levels with naproxen and is in accord  
12   with the established inhibitory effects of prostaglandins on IFN responses (51-53).

13           To test for evidence of the crosstalk module we have identified between HBEGF<sup>+</sup>  
14   inflammatory macrophages and synovial fibroblast EGFR responses (Figs. 2, 3), we further  
15   examined the effects of naproxen in our tissue explant system. In addition to blocking  
16   prostaglandin levels in the RA synovial explants and reducing *HBEGF* expression (Fig. 4G),  
17   naproxen also reduced GCSF (*CSF3*) secretion, indicating a decoupling of the macrophage-  
18   fibroblast circuit (Fig. 4H). Importantly, as mentioned above and in Fig. S5 and B, naproxen  
19   does not interfere with TNF-mediated effects and thus despite dampening prostaglandin levels in  
20   the tissue assay (Fig. 4F), naproxen treatment did not suppress IL-1b protein production in the *ex*  
21   *vivo* synovial cell assay (data not shown). TNF blockade, however, was effective in blocking  
22   *HBEGF* expression, as well as, IL-1b and GCSF protein levels (Fig. 4C, D) and thereby derails

1 generation of both the HBEGF<sup>+</sup> inflammatory macrophages-synovial fibroblast axis and pro-  
2 inflammatory M1-like macrophages (Fig. 4I).

3 To directly assay EGFR-dependent fibroblast gene expression changes consistent with  
4 HBEGF<sup>+</sup> inflammatory macrophage influence, we introduced an EGFR inhibitor into the *ex vivo*  
5 assay. Importantly, the EGFR inhibitor reversed the majority of the synovial fibroblast gene  
6 expression effects elicited by HBEGF<sup>+</sup> inflammatory macrophages (77%), including a  
7 suppression of *CCL20*, *CSF3*, *LIF*, *IL33*, *IL11*, and *PLAU* (Fig. 4J, 3A). Together, these data  
8 provide evidence within patient tissues for the crosstalk module we identified between HBEGF<sup>+</sup>  
9 inflammatory macrophages and tissue-resident fibroblasts and furthermore indicates blockade of  
10 EGFR responses may provide a non-immunosuppressive therapeutic approach for RA.

11

## 12 **Discussion**

13 Challenges in treating autoimmune and inflammatory disorders have led to strategies including  
14 administering medications sequentially until one is found to improve clinical symptoms. In an  
15 effort to improve *a priori* knowledge of which medication will be most effective, we have taken  
16 into consideration the complexity of cellular interactions in affected tissues and identified a  
17 population of HBEGF<sup>+</sup> inflammatory macrophages in inflamed RA joints and delineated their  
18 deterministic tissue-resident and disease-specific factors. Furthermore, we have identified  
19 medications that successfully interfere with the generation of these macrophages and the support  
20 they provide towards fibroblast invasiveness, which contributes to irreversible joint destruction  
21 in RA.

22 The crosstalk mechanisms and functional output between macrophages and fibroblasts in  
23 the RA tissue environment differ from other pathologic states driven by these two cell types. In

1 fibrosis, macrophages and fibroblasts drive excessive collagen deposition blocking tissue  
2 function in part by static physical barriers rather than invasion and erosion (2, 54, 55). We find in  
3 RA, fibroblast products such as prostaglandins combine with chronic inflammatory signals such  
4 as TNF to polarize macrophages into a state that is distinct from inflammatory M1, anti-  
5 inflammatory wound healing M2 and pro-fibrotic TGF $\beta$ -expressing macrophages. The RA-  
6 enriched HBEGF<sup>+</sup> inflammatory macrophages produce a defined subset of inflammatory  
7 products such IL-1 and the EGF growth factors HBEGF and epiregulin. As HBEGF<sup>+</sup>  
8 inflammatory macrophages subsequently induce invasiveness in synovial fibroblasts (Fig. 3F),  
9 we classify them as ‘pro-invasive macrophages’.

10 While leukocyte-derived growth factors have emerged as critical components in tissue  
11 homeostasis and repair (1, 56), our data uncover a pathologic correlate. In the RA tissue  
12 environment, macrophage-produced EGF ligands lead to EGFR-dependent synovial fibroblast  
13 invasiveness and GCSF production concomitant with enhanced neutrophil accumulation (Fig.  
14 3)—dominant features of RA joint pathology (33, 34, 37). In inflammatory arthritis *in vivo*  
15 models, disease progression is driven by EGF ligands, EGF receptor activity and the enzyme  
16 iRhom2, which mediates release of both TNF and HBEGF from immune cells (57-60). Our data  
17 provide relevance to these findings in human disease and a mechanistic understanding of the  
18 cellular crosstalk program involving growth factors in RA joints. Furthermore, considerable  
19 evidence implicates TNF and HBEGF as pathologic drivers of kidney disease in the autoimmune  
20 condition lupus (61, 62). Thus, linked TNF and EGFR responses may be a unifying and  
21 targetable feature in tissues affected by disparate autoimmune conditions.

22 Using perturbations relevant to human disease, namely FDA-approved medications, we  
23 have detailed the disruption of intercellular interactions in patient samples and the resulting



1 phenotypes, thereby gaining insights into the complex consequences of medication in RA joint  
2 tissue. In particular, our data has yielded insights into a longstanding question of why anti-  
3 inflammatory COX inhibitors known as NSAIDs are not “disease-modifying” in RA (15). Our  
4 data suggest NSAIDs block the prostaglandin-mediated arm in HBEGF<sup>+</sup> inflammatory  
5 polarization, but still permit macrophage TNF responses (Fig. 4I, Fig. S5B-C). Thus, NSAID  
6 therapy in RA likely redirects HBEGF<sup>+</sup> inflammatory macrophages towards a classic pro-  
7 inflammatory M1-like phenotype, which would presumably perpetuate inflammation albeit  
8 through a different pathway. In that regard, NSAIDS may best be used in combination with  
9 medications like anti-TNFs, in order to target two arms of HBEGF<sup>+</sup> inflammatory macrophage  
10 polarization. However COX inhibition by naproxen also proved problematic in the other RA-  
11 enriched macrophage phenotype, inducing the Cluster 4 ‘IFN/STAT’ response (Fig. 4I),  
12 consistent with robust suppression of IFN responses by prostaglandins (51, 53). Thus for two  
13 RA-enriched macrophage phenotypes, NSAIDS are permissive of pathologic responses. These  
14 data speak to a greater need in understanding tissue microenvironment factors that polarize  
15 macrophages and how in the presence of therapeutics the intercellular communication networks  
16 are rewired and subsequently repolarize macrophages into states that either resolve or perpetuate  
17 pathology.

18       Along with the seminal synovial explant assay that incited the use of TNF therapies in  
19 RA (45), our work impels the implementation of *ex vivo* assays to better understand and treat  
20 patients with autoimmune and inflammatory disorders. Specifically, in addition to detecting  
21 genome-wide established targets of anti-TNF and tofacitinib therapies, our RA patient *ex vivo*  
22 synovial tissue bioassay provides a human- and disease-relevant system that unmasked the  
23 interconnectivity and drug responsiveness of the synovial macrophage-fibroblast interaction we

1 identified. Human tissue-based therapeutic testing could offer guidance in relevant therapeutic  
2 choices based directly on the response of the unique cellular composition of a patient's tissue.  
3 For RA, this could be accomplished with the expanding use of synovial biopsies (21, 22, 63) and  
4 ultimately over time with the identification of circulating biomarkers that correlate with tissue-  
5 based assays. Lastly, effective blockade of the macrophage-induced fibroblast response in the  
6 RA tissue *ex vivo* assay with an EGFR inhibitor developed for cancer warrants testing of this as a  
7 new treatment direction, particularly as it could represent a non-immunosuppressive treatment  
8 option.

9

10

11

## 12 **MATERIAL and METHODS**

### 13 **Study Design**

14 The experimental objectives for this study involved directly analyzing primary human tissues to  
15 understand how tissue and disease factors influence macrophage responses in the autoimmune  
16 disease RA. This study included the use of tissue samples from patients treated for RA and OA,  
17 in addition to healthy human blood donors. Inclusion and exclusion criteria for the arthritis  
18 patients were based on standard clinical diagnostic criteria. Perceived outliers in sequencing  
19 datasets remained in the analyses upon application of surrogate variable analysis by svaseq  
20 3.26.0. Human donor blood-derived macrophage biologic replicates used for various assays  
21 depended on the robustness of the response for each type of assay and therein the amount of  
22 variability seen across donors, whereby for robust assay responses typically ~n=4 donors were  
23 used but for assays with higher variability up to n=8 donors were used.

24

1 **Patient recruitment and CD14+ synovial cell sorting for RNA-seq**

2 The multicenter RA/SLE Network of the Accelerating Medicines Partnership (AMP) consortium  
3 enrolled individuals meeting the ACR 2010 RA classification according to protocols approved  
4 by the institutional review board at each site (22, 44). Synovial tissues were collected from  
5 ultrasound-guided biopsies or joint replacement surgery and viably frozen in Cryostor CS10  
6 cryopreservation media (Sigma-Aldrich). At a central processing site, tissues were dissociated  
7 and cells were FACS sorted (BD FACSAria Fusion) into fibroblast, macrophage, B cell and T  
8 cell populations. Macrophages were sorted based on CD14+CD45+ cell surface expression. For  
9 bulk CD14+ synovial cell population RNA-seq, ~1,000 cells were sorted directly into RLT  
10 buffer (Qiagen). For CD14+ synovial single-cell RNA-seq, ~100 live cells per patient were  
11 individually plated and lysed in 384 well plates.

12

13 **Bulk RNA-seq of sorted CD14+ synovial cell population**

14 Full-length cDNA and sequencing libraries were generated using Illumina Smart-Seq2 protocol  
15 (64). Libraries were sequenced on a MiSeq System (Illumina) to generate 35 length base pair,  
16 paired-end reads.

17

18 **Single-cell RNA-seq of sorted CD14+ synovial cells**

19 Single-cell RNA-seq was performed on sorted macrophage and synovial fibroblast using the  
20 CEL-Seq2 protocol (65) in 384 well plates. Libraries were sequenced on a HiSeq 2500  
21 (Illumina) in Rapid Run Mode to generate 76 length base pair, paired-end reads.

22

23

## 1 **CD14+ single-cell RNA-seq read alignment and differential gene expression analysis**

2 RNA-seq reads were aligned with STAR version 2.5.2b (66) to the hg19 reference genome.  
3 Transcript levels were quantified as Counts Per Million using the GENCODE Release 24  
4 annotation. The single cell gene expression matrix was clustered based on a canonical correlation  
5 analysis (CCA) methodology (22). Briefly, highly variable genes identified from single-cell  
6 RNA-seq and bulk RNA-seq datasets were integrated based on genes that maximized the  
7 correlation between the two datasets. The correlated canonical variates were then used to  
8 construct a nearest neighbor network thereby generating clusters that are verified to be present in  
9 the bulk data. Using the four clusters identified from the CCA method, the top ten canonical  
10 coordinates were used to generate a Euclidean distance matrix for tSNE visualization using a  
11 perplexity parameter of 40. Positive and negative cluster markers were identified using the  
12 Wilcoxon rank sum test with a Bonferroni correction for multiple testing.

## 14 **CD14+ bulk RNA-seq read alignment and differential gene expression analysis**

15 Reads were aligned and quantified with STAR version 2.4.2a (66) against the GRCh38 genome  
16 and GENCODE Release 27 annotation, respectively. Differential expression analyses and batch-  
17 correction were performed using DESeq2 (67) version 1.18.1 and svaseq (68) version 3.26.0,  
18 respectively.

## 20 **Pathway analysis**

21 Gene lists were processed for GSEA(69) version 3.0 by taking the inverse of the FDR adjusted  
22 p-value for each gene and multiplying it by the sign of the log<sub>2</sub> fold change relative to the  
23 baseline conditions. GSEA was run under the "pre-rank" mode with 1,000 permutations for each

1 of the gene sets available in MSigDB and ImmunSigDB Version 5.2. Additional pathway  
2 analysis was performed using QIAGEN's Ingenuity® Pathway Analysis (IPA®, QIAGEN  
3 Redwood City, [www.qiagen.com/ingenuity](http://www.qiagen.com/ingenuity)). Reported pathways were referenced as follows with  
4 the MSigDB systematic name in parentheses: TNF- $\alpha$  Signaling via NF $\kappa$ B (M5890), Interferon- $\gamma$   
5 Response (M5913), Interferon- $\alpha$  Response (M5911), Inflammation (M5932), MYC Targets  
6 (M5926, M5928), Oxidative Phosphorylation (M5936), Translation (M11989), Cell Cycle  
7 (M543), Induced by EGF (M2613), Hypoxia Induced (M5891), Interferon Responsive Genes  
8 (M9221), EGFR Inhibitor (M16010), and KEGG Ribosome Pathway (M189). Gene sets derived  
9 from the CD14+ synovial single-cell RNA-seq markers were composed of up to 500 genes that  
10 exhibited  $>0.5$  log<sub>2</sub> fold change (positive marker) or  $<-0.5$  log<sub>2</sub> fold change (negative marker  
11 genes) relative to all other clusters, sorted by their fold change.

12

### 13 **Independent RA arthroplasty cohort analyzed by droplet-based single-cell RNA-seq**

14 In an independent analysis, we collected synovial tissue from five RA patients consented under  
15 HSS RA Studies (IRB#2014-317 and 2014-233) during arthroplasty and synovectomy  
16 procedures. Tissues were dissociated into single cell preparations and all cells were run through  
17 Drop-seq protocol and sequenced on a HiSeq 2500 (Illumina)(28). Following cell and gene  
18 filtering(28), we applied Seurat version 2.3.0 to generate PCA based single cell clusters, which  
19 were labeled based on cell-type markers. 20,031 single cells were visualized using the t-SNE  
20 implementation in Seurat using a perplexity parameter of 20 and 13 principal components. After  
21 identifying a macrophage cluster consistent with our previous results (4,212 single cells), we re-  
22 applied Seurat and identified distinct subpopulations and visualized in t-SNE space.

23

## 1 **Cell culture for human blood-derived macrophages and synovial fibroblasts**

2 Human CD14<sup>+</sup> monocytes were purified from leukocyte preparations purchased from the New  
3 York Blood Center and differentiated into blood-derived macrophages for 1–2 d in 10 ng/ml M-  
4 CSF (PeproTech) and RPMI 1640 medium (Life Technologies)/10% defined FBS (Hyclone).  
5 Cells were stimulated with 20 ng/ml recombinant human TNF (PeproTech). Drug treatments  
6 were administered 15 minutes after TNF exposure to both the top and bottom wells of the  
7 transwell system to achieve the stated final concentrations. After suspending in DMSO according  
8 to the company's instructions, auranofin (Sigma Aldrich) was added to cells at 500 nM, A77  
9 1726 (Santa Cruz) was added at 50 mM, Tyrphostin AG 1478 (Sigma Aldrich) at 4  $\mu$ M, GW  
10 627368X (Cayman Chemical) at 10  $\mu$ M, sulfasalazine (Sigma Aldrich) at 3  $\mu$ M,  
11 hydroxychloroquine sulfate (Sigma Aldrich) at 50  $\mu$ M, methotrexate (Cayman Chemical) at 110  
12  $\mu$ M, tofacitinib citrate (Cayman Chemical) at 1 $\mu$ M\_ENREF\_61, and Pam3CSK4 (InvivoGen) at  
13 1000  $\mu$ g/mL. Dexamethasone (Sigma Aldrich), and prostaglandin E2 (Sigma) were first  
14 suspended in absolute ethanol and then added to cells at 100 nM, and 280 nM, respectively.  
15 Naproxen was suspended in RPMI supplemented with 10% FBS and then added to cells at a final  
16 concentration of 100  $\mu$ M. Anti-TNF was provided as adalimumab and was added to cells at a  
17 final concentration of 50  $\mu$ g/mL.

18  
19 Human synovial fibroblasts derived from de-identified synovial tissues of RA patients  
20 undergoing arthroplasty (HSS IRB#14-033)\_ENREF\_60. Dissociated cells were plated in aMEM  
21 based media up to 10 days, washing the media numerous times to remove dying blood cell  
22 components. Synovial fibroblasts at passages 4-6 were used for experiments. The diagnoses of  
23 RA were based on the ACR 2010 criteria. For Transwell culture experiments, synovial

1 fibroblasts adhered to polyester chambers with 0.4- $\mu$ m pores (Corning) and were suspended  
2 above the wells containing macrophages, with a ratio of fibroblasts to macrophages of 1:16  
3 based on the size of the cells and their coverage of the culture well surface. The number of  
4 donors used for each experiment is listed in the figure legend and refers to unique donors for  
5 both the blood-derived macrophages and for the synovial fibroblast lines.

6

### 7 **RNA-seq for human blood-derived macrophages and synovial fibroblasts**

8 Total RNA was first extracted using RNeasy mini kit (Qiagen). Tru-seq (non-stranded and PolyA  
9 selected) sample preparation kits (Illumina) were then used to purify poly-A transcripts and  
10 generate libraries with multiplexed barcode adaptors. Single-end libraries were multiplexed,  
11 pooled, and sequenced using the Single Read Clustering with 100 cycles for 3 lanes and 50  
12 cycles for 6 lanes on an Illumina HiSeq 4000. Paired end libraries were multiplexed, pooled and  
13 sequenced using the Paired End Clustering protocol with 51x2 cycles sequencing for 4 lanes on  
14 an Illumina HiSeq 2500. Sequencing was performed by the Weill Cornell Medical College  
15 Genomics Resources Core Facility. RNA-seq read alignment, quantification, differential testing,  
16 and pathway analysis was performed as previously described.

17

### 18 **Real-time PCR**

19 RNA obtained using RNAeasy Mini kit (Qiagen) with DNase treatment was reverse transcribed  
20 into cDNA (Fermentas) and analyzed by real-time quantitative PCR (Fast SYBR Green; Applied  
21 Biosystems) on a 7500 Fast Real-Time PCR System (Applied Biosystems). Gene-specific primer  
22 sequences were as previously described\_ENREF\_63 or listed in the Table below. Expression  
23 levels were normalized to GAPDH or TBP.

1

| Gene         | Forward Primer        | Reverse Primer         |
|--------------|-----------------------|------------------------|
| AREG         | GCTGCGAAGGACCAATGAGA  | CCCCAGAAAATGGTTCACGC   |
| BTC          | GCTTGGCATTCTTAAGCCC   | GGTCCCTACCTGGTCTCTCC   |
| CSF3         | CCAGGAGAAGCTGGTGAGTG  | GAAAAGGCCGCTATGGAGTT   |
| EGF          | GGATGTGCTTGATAAGCGGC  | ACGGTCACCAAAAAGGGACA   |
| EPGN         | CATCAACGGTGCTTGTGCAT  | ACAAAGGCCTCACAGTGGTC   |
| EREG         | ATCACAGTCGTCGGTTCCAC  | AGGCACACTGTTATCCCTGC   |
| GAPDH        | ATCAAGAAGGTGGTGAAGCA  | GTCGCTGTTGAAGTCAGAGGA  |
| HBEGF        | AGGAGCACGGGAAAAGAAA   | CTCAGCCCATGACACCTCTC   |
| IL1A         | AGTAGCAACCAACGGGAAGG  | AAGGTGCTGACCTAGGCTTG   |
| IL33         | TGAATCAGGTGACGGTGTTG  | TGAAGGACAAAGAAGGCCTG   |
| IP10         | ATTTGCTGCCTTATCTTTCTG | TCTCACCTTCTTTTTTCATTGT |
| STAT4        | GAGACCAGCTCATTGCCTGT  | CAATGTGGCAGGTGGAGGAT   |
| TGF $\alpha$ | CTCCTGAAGGGAAGAACCGC  | CAGGCCAAGTAGGAAGGTCTG  |
| PLAUR        | GCTGCAACACCACCAATGC   | TTTTCGGTTCGTGAGTGCCG   |
| PLAUR FAIRE  | TCACTCTGTCACCCAGGCTA  | GTGCCCTGTAATCCCAGTT    |

2

### 3 **Western blots on human blood-derived macrophages**

4 Western blot analyses using a STAT4 (Santa Cruz) and HSP90 (Cell Signaling Technology)  
5 antibody were performed using standard procedures with the additional step of adding Pefabloc  
6 (Sigma-Aldrich) to macrophage cultures before cell lysis to prevent STAT protein degradation.

7

### 8 **Flow cytometry on human blood-derived macrophages**

9 Blood-derived macrophages were resuspended in 100 $\mu$ L FACS buffer (PBS with 1% FBS) and  
10 stained with FITC-conjugated CD87/PLAUR (VIM5-Miltenyi Biotec), acquired by FACSCanto  
11 (BD Biosciences) and analyzed using FlowJo (Tree Star, Inc.) software.

12

### 13 **Assay for Transposase-Accessible Chromatin (ATAC)-Seq**

14 ATAC-seq was performed as previously described(70). Human blood-derived macrophages were  
15 treated for 3 hours with 20ng/ml TNF (Peprotech) and/or 280nM PGE2 (Sigma-Aldrich). 50,000



1 cells were washed in PBS, lysed (lysis buffer: 10 mM Tris-HCl, pH 7.4, 10 mM NaCl, 3 mM  
2 MgCl<sub>2</sub> and 0.1% IGEPAL CA-630) and centrifuged immediately at 500g for 10 min to obtain  
3 nuclei. The pellet was resuspended in the transposase reaction mix (25 µl 2× TD buffer, 2.5 µl  
4 transposase (Illumina) and 22.5 µl nuclease-free water) and incubated at 37°C for 30 min. DNA  
5 was purified using a Qiagen MinElute kit and library fragments amplified for 13 cycles using 1X  
6 NEB next PCR master mix and custom Nextera PCR primers(70). The libraries were purified  
7 using Agencourt AMPure XP PCR Purification kit (Beckman Coulter) and single-end sequenced  
8 on a HiSeq 2500 (Illumina).

9

## 10 **FAIRE qPCR**

11 FAIRE experiments were performed as previously described (71). Chromatin was crosslinked by  
12 treating cells with 1% formaldehyde for 7 min and the reaction quenched with 0.125 M glycine  
13 for 5 min. Cells were washed with cold PBS and scraped, followed by a second wash. Fixed cells  
14 were lysed in buffer LB1 (50 mM HEPES-KOH, pH 7.5, 140 mM NaCl, 1 mM EDTA, 10%  
15 glycerol, 0.5% NP-40, 0.25% Triton X-100, and protease inhibitors) for 10 min. Pelleted nuclei  
16 were resuspended in buffer LB2 (10 mM Tris-HCl, pH 8.0, 200 mM NaCl, 1 mM EDTA,  
17 0.5 mM EGTA, and protease inhibitors) and incubated on a rotator for 10 min. The nuclei were  
18 pelleted and lysed in buffer LB3 (10 mM Tris-HCl, pH 8.0, 100 mM NaCl, 1 mM EDTA,  
19 0.5 mM EGTA, 0.1% Na-deoxycholate, 0.5% N-lauroylsarcosine, and protease inhibitors).  
20 Chromatin was sheared using a Bioruptor Pico device (Diagenode). A total of 10% of sonicated  
21 nuclear lysates were saved as input. Phenol-chloroform-purified nuclear lysates and de-  
22 crosslinked input DNA were used for qPCR analysis using specific primers for the upstream  
23 region. Chromatin accessibility is displayed relative to total input.

1 **Prostaglandin E2 EIA Kit**

2 Culture supernatants were collected from the culture after 24 hours, diluted 1:50 in plain RPMI,  
3 and prostaglandin concentrations measured using the Prostaglandin E2 EIA Kit-Monoclonal  
4 (Cayman Chemical). ELISA plates were read on Varioskan Flash Multimode Reader  
5 (ThermoFisher Scientific).

6

7 **Neutrophil viability assay**

8 Supernatants were collected from cultures of human macrophages and synovial fibroblasts after  
9 24 hours and frozen at -80 °C. Whole blood from healthy human subjects was collected into  
10 heparin coated tubes. Neutrophils were isolated with the EasySep Direct Human Neutrophil  
11 Isolation Kit (Stemcell Technologies) with “The Big Easy” EasySep Magnet. In a 12-well plate,  
12 600,000 neutrophils were plated in 800 µL of supernatant for 24 hours. Neutrophil viability was  
13 measured using Muse Annexin V and Dead Cell Assay Kit on a Muse Cell Analyzer mini-flow  
14 cytometer (EMD Millipore).

15

16 **Fibroblast invasion assay**

17 Human synovial fibroblasts were plated in transwells with macrophages as in the transwell  
18 experiments. AG 1478 (Sigma Aldrich) was added at 4 µM for 32 hours. Fibroblasts were  
19 trypsinized and re-plated in 500µL plain alpha-MEM with 10 ng/ml M-CSF at 0.1 x 10<sup>6</sup> cells per  
20 well into 24-well Corning BioCoat Matrigel Invasion Chambers. Macrophages were resuspended  
21 in 750 µL plain alpha-MEM and seeded underneath invasion transwells in the appropriate  
22 conditions. AG 1478 was added at a concentration of 4 µM; after 18 hours, the fibroblasts were

1 fixed for 10 minutes in ice-cold methanol and stained using crystal violet. Invasive fibroblast  
2 numbers were quantified via light microscopy.

3

#### 4 **Human RA synoviocyte cultures**

5 For synoviocyte cultures, RA patient synovial tissue was obtained from patients consented into  
6 the HSS FLARE study (IRB# 2014-233). Tissues were digested with Liberase TL (100 µg/mL,  
7 Roche) and DNaseI (100 µg/mL, Roche) for 15 minutes and passed through three 70 µM cell  
8 strainers. Cells were then suspended in 1 mL RBC Lysis Buffer (gift of J. Lederer, BWH) for 3  
9 minutes followed by addition of RPMI/10%FBS/1%Glutamine to quench the reaction.  
10 Disaggregated synoviocytes were plated in RPMI/10%FBS/1%Glutamine at  $0.2 \times 10^6$  in 96-well  
11 plates. Cells were treated with drugs at aforementioned concentrations for 24 hours. Supernatants  
12 and RNA were collected for Luminex experiments and quantitative PCR, respectively. For RNA-  
13 seq, the samples were multiplexed in eight samples per lane, 50 cycles, single-end reads, with  
14 Truseq (Illumina) for library prep and a HiSeq 4000 (Illumina) ran in the Weill Cornell Medical  
15 College Genomics Resources Core Facility. RNA-seq read alignment, quantification, differential  
16 testing, and pathway analysis was performed as previously described(29).

17

#### 18 **Luminex**

19 Supernatants were collected from macrophage-fibroblast cultures or synoviocyte cultures at 48  
20 hours. Customized Luminex panels were ordered from R&D Systems. Protein concentrations  
21 were read by a MAGPIX from EMD Millipore using xPONENT 4.2.

22

23

## 1 **Statistical analysis**

2 Data are shown as mean and standard error unless stated otherwise. Two-tailed paired t-tests  
3 were performed for human sample derived qPCR and ELISA data using GraphPad Prism version  
4 5.04 for Windows. Luminex multiplex ELISA experimental data was tested for normality by the  
5 Shapiro-Wilks test with a significance threshold of  $p < 0.05$  and was found to not follow a  
6 Gaussian distribution. Subsequent statistical analysis was thus performed by Wilcoxon signed  
7 rank tests, a non-parametric method, using GraphPad Prism. Single-cell RNA-seq clusters were  
8 identified using a Canonical Correlation Analysis (CCA)(22). Markers for different clusters were  
9 determined by Bonferroni corrected Wilcoxon rank sum tests implemented in Seurat version  
10 2.3.0. Visualization of intersecting sets was performed using UpSetR version 1.3.3(72). Testing  
11 for differentially expressed genes from bulk RNA-seq count data was performed using DESeq2  
12 version 1.18.1 and surrogate variable analysis was performed using svaseq version 3.26.0, both  
13 run on the R version 3.3.2. All RNA-seq significance levels are reported as False Discovery Rate  
14 (FDR) adjusted p-values. Spearman and Pearson correlation analysis was performed using the  
15 seaborn statistical data visualization package version 0.8.1 run on Python version 3.6.4.  
16 Statistical significance of pathway analysis reported as the Normalized Enrichment Score and  
17 FDR adjusted p-values determined from testing of 1,000 permutations from GSEA version 3.0.  
18 Pathway z-scores for upstream regulatory analyses were performed using Ingenuity® Pathway  
19 Analysis (IPA®, QIAGEN). All data transformations for visualization purposes, replicate  
20 numbers, and statistical significance thresholds are reported in the Methods and Figure Legends.

21

22

23

1 **Data Availability**

2 RNAseq data have been deposited to database of Phenotypes and Genotypes (dbGaP) with the  
3 accession numbers phs001340.v1.p1 and phs001529.v1.p1 as well as the Gene Expression  
4 Omnibus (GEO) database with the accession numbers GSE57723, GSE95588, and GSE100382.  
5 The CD14<sup>+</sup> synovial single-cell data generated by the AMP consortium is housed at  
6 <http://immport.org> with the study accession numbers SDY998 and SDY999.

7

8 **Supplementary Materials**

9 **Fig. S1.** Gene markers for synovial CD14<sup>+</sup> single-cell clusters.

10 **Fig. S2.** Identification of synovial HBEGF<sup>+</sup> inflammatory macrophages in an independent RA  
11 patient study.

12 **Fig. S3.** The transcriptome of human blood-derived macrophage exposed to synovial fibroblasts  
13 and TNF compared with published pathways and macrophage polarization phenotypes.

14 **Fig. S4.** Synovial fibroblasts express EGF receptors while HBEGF<sup>+</sup> inflammatory macrophages  
15 express two EGF ligands.

16 **Fig. S5.** RA medications impose highly variable effects depending on inflammatory  
17 macrophages depending on the presence of synovial fibroblasts.

18 **Table S1.** Baseline Characteristics.

19 **Table S2.** Participants Characteristics.

20

21

22

23

1 **References and Notes:**

- 2 1. L. C. Rankin, D. Artis, Beyond Host Defense: Emerging Functions of the Immune  
3 System in Regulating Complex Tissue Physiology. *Cell* **173**, 554-567 (2018).
- 4 2. T. A. Wynn, A. Chawla, J. W. Pollard, Macrophage biology in development, homeostasis  
5 and disease. *Nature* **496**, 445-455 (2013).
- 6 3. Y. Lavin *et al.*, Tissue-resident macrophage enhancer landscapes are shaped by the local  
7 microenvironment. *Cell* **159**, 1312-1326 (2014).
- 8 4. Y. Okabe, R. Medzhitov, Tissue biology perspective on macrophages. *Nat Immunol* **17**,  
9 9-17 (2016).
- 10 5. D. Gosselin *et al.*, Environment drives selection and function of enhancers controlling  
11 tissue-specific macrophage identities. *Cell* **159**, 1327-1340 (2014).
- 12 6. F. Ginhoux, M. Guilliams, Tissue-Resident Macrophage Ontogeny and Homeostasis.  
13 *Immunity* **44**, 439-449 (2016).
- 14 7. E. L. Gautier *et al.*, Gene-expression profiles and transcriptional regulatory pathways that  
15 underlie the identity and diversity of mouse tissue macrophages. *Nat Immunol* **13**, 1118-  
16 1128 (2012).
- 17 8. M. Hulsmans *et al.*, Macrophages Facilitate Electrical Conduction in the Heart. *Cell* **169**,  
18 510-522 e520 (2017).
- 19 9. H. Keren-Shaul *et al.*, A Unique Microglia Type Associated with Restricting  
20 Development of Alzheimer's Disease. *Cell* **169**, 1276-1290 e1217 (2017).
- 21 10. J. L. Witztum, A. H. Lichtman, The influence of innate and adaptive immune responses  
22 on atherosclerosis. *Annu Rev Pathol* **9**, 73-102 (2014).

- 1 11. A. J. Pagan, L. Ramakrishnan, Immunity and Immunopathology in the Tuberculous  
2 Granuloma. *Cold Spring Harb Perspect Med* **5**, (2014).
- 3 12. J. Xue *et al.*, Transcriptome-based network analysis reveals a spectrum model of human  
4 macrophage activation. *Immunity* **40**, 274-288 (2014).
- 5 13. M. Locati, A. Mantovani, A. Sica, Macrophage activation and polarization as an adaptive  
6 component of innate immunity. *Adv Immunol* **120**, 163-184 (2013).
- 7 14. M. F. Neurath, Cytokines in inflammatory bowel disease. *Nat Rev Immunol* **14**, 329-342  
8 (2014).
- 9 15. L. J. Crofford, Use of NSAIDs in treating patients with arthritis. *Arthritis Res Ther* **15**  
10 **Suppl 3**, S2 (2013).
- 11 16. S. M. Pyonteck *et al.*, CSF-1R inhibition alters macrophage polarization and blocks  
12 glioma progression. *Nat Med* **19**, 1264-1272 (2013).
- 13 17. L. Cassetta, T. Kitamura, Targeting Tumor-Associated Macrophages as a Potential  
14 Strategy to Enhance the Response to Immune Checkpoint Inhibitors. *Front Cell Dev Biol*  
15 **6**, 38 (2018).
- 16 18. I. A. Udalova, A. Mantovani, M. Feldmann, Macrophage heterogeneity in the context of  
17 rheumatoid arthritis. *Nature reviews. Rheumatology* **12**, 472-485 (2016).
- 18 19. G. D. Kalliolias, L. B. Ivashkiv, TNF biology, pathogenic mechanisms and emerging  
19 therapeutic strategies. *Nat Rev Rheumatol* **12**, 49-62 (2016).
- 20 20. I. B. McInnes, G. Schett, The pathogenesis of rheumatoid arthritis. *N Engl J Med* **365**,  
21 2205-2219 (2012).

- 1 21. A. M. Mandelin, 2nd *et al.*, Transcriptional Profiling of Synovial Macrophages using  
2 Minimally Invasive Ultrasound-Guided Synovial Biopsies in Rheumatoid Arthritis.  
3 *Arthritis Rheumatol*, (2018).
- 4 22. F. Zhang, Wei K, Slowikowski K, Foseka C, Rao D, Kelly S, Goodman S, Tabechian L,  
5 Salomon-Escoto K, Watts G, Apruzzese W, Lieb D, Boyle D, Mandelin A, AMP  
6 RA/SLE Network, Boyce B, DiCarlo E, Gravallese E, Gregerson P, Moreland L,  
7 Firestein G, Haconhen N, Nusbaum C, Lederer J, Perlman H, Pitzalis C, Filer A, Holers  
8 M, Bykerk V, Donlin L, Anolik J, Brenner M, Raychaudhuri S. , Defining Inflammatory  
9 Cell States in Rheumatoid Arthritis Joint Tissues by Integrating Single-cell  
10 Transcriptomics and Mass Cytometry. *biorxiv* doi: **10.1101/351130**, (2018).
- 11 23. A. C. Villani *et al.*, Single-cell RNA-seq reveals new types of human blood dendritic  
12 cells, monocytes, and progenitors. *Science* **356**, (2017).
- 13 24. D. M. Frucht *et al.*, Stat4 is expressed in activated peripheral blood monocytes, dendritic  
14 cells, and macrophages at sites of Th1-mediated inflammation. *Journal of immunology*  
15 **164**, 4659-4664 (2000).
- 16 25. M. Feldmann, Translating molecular insights in autoimmunity into effective therapy.  
17 *Annu Rev Immunol* **27**, 1-27 (2009).
- 18 26. E. F. Remmers *et al.*, STAT4 and the risk of rheumatoid arthritis and systemic lupus  
19 erythematosus. *N Engl J Med* **357**, 977-986 (2007).
- 20 27. R. A. Gordon, G. Grigoriev, A. Lee, G. D. Kalliolias, L. B. Ivashkiv, The interferon  
21 signature and STAT1 expression in rheumatoid arthritis synovial fluid macrophages are  
22 induced by tumor necrosis factor alpha and counter-regulated by the synovial fluid  
23 microenvironment. *Arthritis Rheum* **64**, 3119-3128 (2012).



- 1 28. W. Stephenson *et al.*, Single-cell RNA-seq of rheumatoid arthritis synovial tissue using  
2 low-cost microfluidic instrumentation. *Nat Commun* **9**, 791 (2018).
- 3 29. L. T. Donlin, A. Jayatilleke, E. G. Giannopoulou, G. D. Kalliolias, L. B. Ivashkiv,  
4 Modulation of TNF-induced macrophage polarization by synovial fibroblasts. *Journal of*  
5 *immunology* **193**, 2373-2383 (2014).
- 6 30. J. P. Edwards, X. Zhang, D. M. Mosser, The expression of heparin-binding epidermal  
7 growth factor-like growth factor by regulatory macrophages. *Journal of immunology* **182**,  
8 1929-1939 (2009).
- 9 31. R. Hildenbrand, G. Wolf, B. Bohme, U. Bleyl, A. Steinborn, Urokinase plasminogen  
10 activator receptor (CD87) expression of tumor-associated macrophages in ductal  
11 carcinoma in situ, breast cancer, and resident macrophages of normal breast tissue.  
12 *Journal of leukocyte biology* **66**, 40-49 (1999).
- 13 32. S. V. Schmidt *et al.*, The transcriptional regulator network of human inflammatory  
14 macrophages is defined by open chromatin. *Cell Res* **26**, 151-170 (2016).
- 15 33. H. L. Wright, R. J. Moots, S. W. Edwards, The multifactorial role of neutrophils in  
16 rheumatoid arthritis. *Nat Rev Rheumatol* **10**, 593-601 (2014).
- 17 34. A. L. Cornish, I. K. Campbell, B. S. McKenzie, S. Chatfield, I. P. Wicks, G-CSF and  
18 GM-CSF as therapeutic targets in rheumatoid arthritis. *Nat Rev Rheumatol* **5**, 554-559  
19 (2009).
- 20 35. M. F. Ware, A. Wells, D. A. Lauffenburger, Epidermal growth factor alters fibroblast  
21 migration speed and directional persistence reciprocally and in a matrix-dependent  
22 manner. *Journal of cell science* **111 ( Pt 16)**, 2423-2432 (1998).

- 1 36. N. Bottini, G. S. Firestein, Duality of fibroblast-like synoviocytes in RA: passive  
2 responders and imprinted aggressors. *Nat Rev Rheumatol* **9**, 24-33 (2013).
- 3 37. E. H. Noss, M. B. Brenner, The role and therapeutic implications of fibroblast-like  
4 synoviocytes in inflammation and cartilage erosion in rheumatoid arthritis. *Immunol Rev*  
5 **223**, 252-270 (2008).
- 6 38. A. J. Naylor, A. Filer, C. D. Buckley, The role of stromal cells in the persistence of  
7 chronic inflammation. *Clin Exp Immunol* **171**, 30-35 (2012).
- 8 39. T. Pap, U. Muller-Ladner, R. E. Gay, S. Gay, Fibroblast biology. Role of synovial  
9 fibroblasts in the pathogenesis of rheumatoid arthritis. *Arthritis Res* **2**, 361-367 (2000).
- 10 40. F. C. Arnett *et al.*, The American Rheumatism Association 1987 revised criteria for the  
11 classification of rheumatoid arthritis. *Arthritis Rheum* **31**, 315-324 (1988).
- 12 41. D. Aletaha *et al.*, 2010 Rheumatoid arthritis classification criteria: an American College  
13 of Rheumatology/European League Against Rheumatism collaborative initiative.  
14 *Arthritis Rheum* **62**, 2569-2581 (2010).
- 15 42. E. Slansky *et al.*, Quantitative determination of the diagnostic accuracy of the synovitis  
16 score and its components. *Histopathology* **57**, 436-443 (2010).
- 17 43. D. E. Orange *et al.*, Identification of Three Rheumatoid Arthritis Disease Subtypes by  
18 Machine Learning Integration of Synovial Histologic Features and RNA Sequencing  
19 Data. *Arthritis Rheumatol*, (2018).
- 20 44. L. T. Donlin *et al.*, Methods for high-dimensional analysis of cells dissociated from  
21 cryopreserved synovial tissue. *Arthritis Res Ther* **20**, 139 (2018).

- 1 45. F. M. Brennan, D. Chantry, A. Jackson, R. Maini, M. Feldmann, Inhibitory effect of TNF  
2 alpha antibodies on synovial cell interleukin-1 production in rheumatoid arthritis. *Lancet*  
3 **2**, 244-247 (1989).
- 4 46. M. E. Weinblatt *et al.*, A trial of etanercept, a recombinant tumor necrosis factor  
5 receptor:Fc fusion protein, in patients with rheumatoid arthritis receiving methotrexate. *N*  
6 *Engl J Med* **340**, 253-259 (1999).
- 7 47. R. Maini *et al.*, Infliximab (chimeric anti-tumour necrosis factor alpha monoclonal  
8 antibody) versus placebo in rheumatoid arthritis patients receiving concomitant  
9 methotrexate: a randomised phase III trial. ATTRACT Study Group. *Lancet* **354**, 1932-  
10 1939 (1999).
- 11 48. G. Zizzo, B. A. Hilliard, M. Monestier, P. L. Cohen, Efficient clearance of early  
12 apoptotic cells by human macrophages requires M2c polarization and MerTK induction.  
13 *Journal of immunology* **189**, 3508-3520 (2012).
- 14 49. A. M. Georgoudaki *et al.*, Reprogramming Tumor-Associated Macrophages by Antibody  
15 Targeting Inhibits Cancer Progression and Metastasis. *Cell Rep* **15**, 2000-2011 (2016).
- 16 50. R. F. da Rocha, M. A. De Bastiani, F. Klamt, Bioinformatics approach to evaluate  
17 differential gene expression of M1/M2 macrophage phenotypes and antioxidant genes in  
18 atherosclerosis. *Cell Biochem Biophys* **70**, 831-839 (2014).
- 19 51. S. Zelenay *et al.*, Cyclooxygenase-Dependent Tumor Growth through Evasion of  
20 Immunity. *Cell* **162**, 1257-1270 (2015).
- 21 52. K. D. Mayer-Barber *et al.*, Host-directed therapy of tuberculosis based on interleukin-1  
22 and type I interferon crosstalk. *Nature* **511**, 99-103 (2014).

- 1 53. F. Coulombe *et al.*, Targeted prostaglandin E2 inhibition enhances antiviral immunity  
2 through induction of type I interferon and apoptosis in macrophages. *Immunity* **40**, 554-  
3 568 (2014).
- 4 54. T. Satoh *et al.*, Identification of an atypical monocyte and committed progenitor involved  
5 in fibrosis. *Nature* **541**, 96-101 (2017).
- 6 55. A. V. Misharin *et al.*, Monocyte-derived alveolar macrophages drive lung fibrosis and  
7 persist in the lung over the life span. *The Journal of experimental medicine* **214**, 2387-  
8 2404 (2017).
- 9 56. D. Burzyn *et al.*, A special population of regulatory T cells potentiates muscle repair. *Cell*  
10 **155**, 1282-1295 (2013).
- 11 57. P. D. Issuree *et al.*, iRHOM2 is a critical pathogenic mediator of inflammatory arthritis.  
12 *The Journal of clinical investigation* **123**, 928-932 (2013).
- 13 58. M. Harada *et al.*, Temporal Expression of Growth Factors Triggered by Epiregulin  
14 Regulates Inflammation Development. *Journal of immunology*, (2015).
- 15 59. C. D. Swanson *et al.*, Inhibition of epidermal growth factor receptor tyrosine kinase  
16 ameliorates collagen-induced arthritis. *Journal of immunology* **188**, 3513-3521 (2012).
- 17 60. L. L. Gompels *et al.*, Human epidermal growth factor receptor bispecific ligand trap  
18 RB200: abrogation of collagen-induced arthritis in combination with tumour necrosis  
19 factor blockade. *Arthritis Res Ther* **13**, R161 (2011).
- 20 61. X. Qing *et al.*, iRhom2 promotes lupus nephritis through TNF-alpha and EGFR signaling.  
21 *The Journal of clinical investigation*, (2018).

- 1 62. G. Bollee *et al.*, Epidermal growth factor receptor promotes glomerular injury and renal  
2 failure in rapidly progressive crescentic glomerulonephritis. *Nat Med* **17**, 1242-1250  
3 (2011).
- 4 63. S. Kelly *et al.*, Ultrasound-guided synovial biopsy: a safe, well-tolerated and reliable  
5 technique for obtaining high-quality synovial tissue from both large and small joints in  
6 early arthritis patients. *Ann Rheum Dis* **74**, 611-617 (2015).
- 7 64. S. Picelli *et al.*, Full-length RNA-seq from single cells using Smart-seq2. *Nat Protoc* **9**,  
8 171-181 (2014).
- 9 65. T. Hashimshony *et al.*, CEL-Seq2: sensitive highly-multiplexed single-cell RNA-Seq.  
10 *Genome Biol* **17**, 77 (2016).
- 11 66. A. Dobin *et al.*, STAR: ultrafast universal RNA-seq aligner. *Bioinformatics* **29**, 15-21  
12 (2013).
- 13 67. M. I. Love, W. Huber, S. Anders, Moderated estimation of fold change and dispersion for  
14 RNA-seq data with DESeq2. *Genome Biol* **15**, 550 (2014).
- 15 68. J. T. Leek, svaseq: removing batch effects and other unwanted noise from sequencing  
16 data. *Nucleic Acids Res* **42**, (2014).
- 17 69. A. Subramanian *et al.*, Gene set enrichment analysis: a knowledge-based approach for  
18 interpreting genome-wide expression profiles. *Proc Natl Acad Sci U S A* **102**, 15545-  
19 15550 (2005).
- 20 70. J. D. Buenrostro, P. G. Giresi, L. C. Zaba, H. Y. Chang, W. J. Greenleaf, Transposition of  
21 native chromatin for fast and sensitive epigenomic profiling of open chromatin, DNA-  
22 binding proteins and nucleosome position. *Nature methods* **10**, 1213-1218 (2013).

- 1 71. J. M. Simon, P. G. Giresi, I. J. Davis, J. D. Lieb, Using formaldehyde-assisted isolation  
2 of regulatory elements (FAIRE) to isolate active regulatory DNA. *Nat Protoc* **7**, 256-267  
3 (2012).
- 4 72. J. R. Conway, A. Lex, N. Gehlenborg, UpSetR: an R package for the visualization of  
5 intersecting sets and their properties. *Bioinformatics* **33**, 2938-2940 (2017).

6  
7  
8  
9 **Acknowledgements:**

10 We thank the HSS orthopedic surgeons (particularly Dr. M. Figgie), rheumatologists, clinical  
11 research coordinators (particularly R. Cummings, M. McNamara and S. Mirza), and the  
12 consented HSS patients; Drs. P. Gulko and T. Laragione (Mt. Sinai) for technical guidance on  
13 synovial fibroblast invasion assays; R. Yuan, D. Oliver, and E. Giannopoulou for assistance with  
14 sequencing data; and C. Blobel and H. Hang for critically reading the manuscript. We also  
15 acknowledge R. Satija, W. Stephenson and A. Bulter of the New York Genome Center for their  
16 previous work on synovial tissue single-cell analysis using Drop-seq technology (28). We  
17 acknowledge the Accelerating Medicines Partnership (AMP): RA/SLE Network for the multi-  
18 site and large-scale collection of arthritis patient synovial tissue samples, cell sorting and RNA  
19 sequencing. We thank the AMP clinicians, scientists administrators and patients. AMP is a  
20 public-private partnership (AbbVie, Arthritis Foundation, Bristol-Myers Squibb, Lupus  
21 Foundation of America, Lupus Research Alliance, Merck Sharp & Dohme, NIH, Pfizer,  
22 Rheumatology Research Foundation, Sanofi, and Takeda Pharmaceuticals International) created  
23 to develop new ways of identifying and validating promising biologic targets for diagnostics and  
24 drug development. **Funding:** Funding was provided by the NIH grants UH2-AR-067676, UH2-

1 AR-067677, UH2- AR-067679, UH2-AR-067681, UH2-AR-067685, UH2-AR-067688, UH2-AR-  
2 067689, UH2-AR-067690, UH2-AR-067691, UH2-AR-067694, and UM2-AR-067678 (AMP  
3 RA/SLE Network); and RO1AR046713, AR050401, and AI046712 (LBI), and K01AR066063  
4 (LTD). **Author Contributions:** DK analyzed sequencing data, prepared figures, and edited the  
5 manuscript; JD performed experiments and analyzed data; IC performed experiments and  
6 prepared figures; FZ analyzed sequencing data; KW designed experimental pipelines and  
7 performed experiments; DK designed experimental pipelines and performed experiments; US  
8 performed experiments; CR performed experiments; AMP recruited patients and performed  
9 experiments; EFD scored the histology slides; MBB designed and supervised experimental  
10 pipelines; VPB and SMG collected clinical data and samples; SR and GR supervised sequencing  
11 data analyses; LBI jointly conceived the project, acquired funding and edited the manuscript;  
12 LTD jointly conceived the project, acquired funding, wrote the manuscript, and supervised the  
13 research experiments and analyses. **Competing interests:** The authors declare no competing  
14 financial interests. **Data and materials availability:** Accession codes and databases for  
15 sequencing data can be found in the Materials and Methods section.
